1                                   **Cell targeting and immunostimulatory properties of**  
2                                   **a novel Fcγ-receptor independent agonistic**  
3                                   **anti-CD40 antibody in rhesus macaques**

4

5   Xianglei Yan<sup>1,2</sup>, Sebastian Ols<sup>1,2</sup>, Rodrigo Arcoverde Cerveira<sup>1,2</sup>, Klara Lenart<sup>1,2</sup>, Fredrika  
6   Hellgren<sup>1,2</sup>, Kewei Ye<sup>1,2</sup>, Alberto Cagigi<sup>1,2</sup>, Marcus Buggert<sup>3</sup>, Falk Nimmerjahn<sup>4</sup>, Jesper  
7   Falkegaard Højten<sup>5,6,7</sup>, Daniel Parera<sup>8</sup>, Ulrich Pessara<sup>8</sup>, Stephan Fischer<sup>8</sup> and Karin Loré<sup>1,2\*</sup>

8

9   <sup>1</sup>Division of Immunology and Allergy, Department of Medicine Solna, Karolinska Institutet  
10   and Karolinska University Hospital, Stockholm, Sweden. <sup>2</sup>Center of Molecular Medicine,  
11   Stockholm, Sweden. <sup>3</sup>Center for Infectious Medicine, Department of Medicine Huddinge,  
12   Karolinska Institutet, Stockholm, Sweden. <sup>4</sup>Division of Genetics, Department of Biology,  
13   University of Erlangen-Nürnberg, Erlangen, Germany. <sup>5</sup>Department of Infectious Diseases,  
14   Aarhus University Hospital, Aarhus, Denmark. <sup>6</sup>Department of Clinical Medicine, Aarhus  
15   University, Aarhus, Denmark. <sup>7</sup>Department of Medicine, University of Colorado Denver,  
16   Aurora, USA. <sup>8</sup>Icano MAB GmbH, Polling, Germany.

17

18   **\*Corresponding author:** Karin Loré, Division of Immunology and Allergy, Department of  
19   Medicine Solna, Karolinska Institutet, Visionsgatan 4, BioClinicum J7:30, Karolinska  
20   University Hospital, 171 64 Stockholm, Sweden.

21   e-mail addresses: [karin.lore@ki.se](mailto:karin.lore@ki.se)

1 **Abstract**

2 Targeting CD40 by agonistic antibodies used as vaccine adjuvants or for cancer  
3 immunotherapy is a strategy to stimulate immune responses. The majority of studied  
4 agonistic anti-human CD40 antibodies require crosslinking of their Fc region to inhibitory  
5 Fc $\gamma$ RIIb to induce immune stimulation although this has been associated with toxicity in  
6 previous studies. Here we introduce an agonistic anti-human CD40 monoclonal IgG1  
7 antibody (MAB273) unique in its specificity to the CD40L binding site of CD40 but devoid  
8 of Fc $\gamma$ -receptor binding, we demonstrate rapid binding of MAB273 to B cells and dendritic  
9 cells resulting in strong activation *in vitro* on human cells and *in vivo* in rhesus macaques.  
10 Dissemination of fluorescently labeled MAB273 after subcutaneous administration was  
11 found predominantly at the site of injection and specific draining lymph nodes. Phenotypic  
12 cell differentiation and upregulation of genes associated with immune activation were found  
13 in the targeted tissues. Antigen-specific T cell responses were enhanced by MAB273 when  
14 given in a prime-boost regimen and for boosting low preexisting responses. MAB273 may  
15 therefore be a promising immunostimulatory adjuvant that warrants future testing for  
16 therapeutic and prophylactic vaccination strategies.

17

18 **Keywords: CD40, Fc $\gamma$ R, adjuvant, vaccine, innate immunity, immunotherapy, rhesus**  
19 **macaque**

20

## 1 **Introduction**

2 In the past decade, development of targeted therapies that block immune checkpoint  
3 inhibitors has revolutionized immunotherapy. However, blocking immune checkpoints alone  
4 such as programmed cell death protein 1 (PD-1) or cytotoxic T-lymphocyte-associated  
5 protein 4 (CTLA-4) is not sufficient as most patients do not induce long-term sustained and  
6 effective responses[1-3]. Additional strategies like the CD40/CD40L interaction has been  
7 explored to specifically target immune cells to enhance antigen presentation and immunity  
8 but has also shown variable success[4]. CD40 is a member of the tumor necrosis factor  
9 receptor superfamily (TNFRSF) predominantly expressed on the cell-surface of antigen  
10 presenting cells (APCs) including B cells, dendritic cells (DCs) and monocytes and works as  
11 a costimulatory receptor[5]. CD40 binds to CD40 ligand (CD40L, CD154) on T cells during  
12 the antigen presentation process which leads to strong activation of both APCs and T cells[6].  
13 Previous studies have shown that CD40 activation can replace T cell help required to drive  
14 CD8 T cell responses[7-9]. CD40 agonists have therefore been of interest to develop as  
15 candidates for adjuvants or cancer immunotherapy[10].  
16  
17 Among the CD40 agonists that have progressed to clinical development, CP-870,893  
18 (Selicrelumab) is the most advanced that has been tested for treatment of several solid tumors,  
19 especially for melanoma[11-14]. While it has been shown that a single dose can induce  
20 antitumor activity in some but not all of the individuals, the main adverse events were  
21 cytokine release syndrome (CRS) with grade 1 to 2, transient liver function test abnormalities  
22 and transient decrease in platelet counts[11-13, 15]. More information is needed of the  
23 mechanisms by which CD40 agonists can mediate beneficial immune stimulation without  
24 unwanted side effects in order to refine CD40 agonists further. A proposed strategy to  
25 improve safety is to modify the fragment crystallizable region (Fc region) of CD40 antibodies.

1 Among the Fc-gamma receptors (Fc $\gamma$ Rs), binding to Fc $\gamma$ RIIb has been shown to potently  
2 enhance the activity of CD40 agonists[16-18]. The new generation of CD40 agonists with an  
3 engineered Fc region to increase binding to Fc $\gamma$ RIIb has therefore been developed[18-22].  
4 However, by introducing mutations in CP-870,893 to increase the affinity to Fc $\gamma$ RIIb side  
5 effects were increased[20, 21]. These results suggest that in addition to the canonical CD40  
6 signaling leading to antigen-specific T cell licensing, alternative pathways such as Fc $\gamma$ RIIb  
7 crosslinking may also induce adverse events that are difficult to control. Manipulating or  
8 reducing Fc $\gamma$ RIIb or even Fc $\gamma$ R crosslinking in general is one strategy to develop safe but  
9 potent CD40 agonistic antibodies.

10

11 MAB273 is a novel humanized rabbit IgG1 with the LALA (L234A and L235A)-mutations  
12 in the Fc region which disables Fc $\gamma$ -receptor-mediated crosslinking[23]. In this study, we  
13 tested the CD40 binding and immune activation capacity of MAB273 in human and rhesus  
14 macaque peripheral blood mononuclear cells (PBMCs) and confirmed that this was  
15 independent of the Fc region. The tolerability and immunostimulatory functions of MAB273  
16 *in vivo* were further tested in rhesus macaques by analyzing biodistribution in different  
17 tissues and cells, innate immune activation and induction of antigen-specific T cells.

18

## 19 **Materials and Methods**

### 20 *Antibodies and the generation of fragments*

21 MAB273, CP-870,893 and isotype control antibody IgG1-LALA were provided by Icano  
22 MAB GmbH. For generation of F(ab')<sub>2</sub> and Fab fragments of MAB273, after pepsin (for  
23 F(ab')<sub>2</sub>) or papain (for Fab) digestion, a CH1-XP column (ThermoFisher, A37054)  
24 containing anti-IgG-CH1 matrix which binds to the CH1 region of IgG was used, thereby  
25 only undigested MAB273 and F(ab')<sub>2</sub> or Fab fragments remained after positive selection. A

1 Fc-XP column (ThermoFisher, 494371201) containing anti-IgG-CH3 matrix which binds to  
2 the CH3 region (on Fc region) of IgG was used to process sample from last step, the  
3 undigested MAB273 which still has Fc region was removed and only F(ab')<sub>2</sub> or Fab  
4 fragments were remained by negative selection.

5

#### 6 *Human samples*

7 The work on human blood samples was approved by the Swedish Institutional Review Board  
8 of Ethics. The informed consent was signed according to the Declaration of Helsinki. All  
9 blood samples were not associated with the features that could be linked to identification  
10 (such as sex and age). Sample size is indicated in each figure legend.

11

#### 12 *Animals*

13 This study was approved by the Local Ethical Committee on Animal Experiments. Six male  
14 Indian-origin rhesus macaques (for toxicity and safety study) and three male and three female  
15 Indian-origin rhesus macaques (for immunogenicity and biodistribution study) were housed  
16 at Astrid Fagraeus Laboratory, Karolinska Institutet. All procedures were performed  
17 according to the guidelines of the Association for Assessment and Accreditation of  
18 Laboratory Animal Care.

19

#### 20 *Immunizations and sampling*

21 In the initial toxicity and safety study, the animals were divided into three groups. Two  
22 animals received intravenous (i.v.) administration of 1 mg/kg anti-CD40 mAb (MAB273),  
23 two animals received 0.1 mg/kg MAB273 by i.v., and the last two animals received  
24 subcutaneous (s.c.) administration of 0.1 mg/kg MAB273. For i.v. administration, an  
25 intravenous infusion of the antibody into the saphenous vein was performed, a total volume

1 of 25ml was slowly distributed stepwise for 30 minutes. For s.c. administration, a single  
2 0.5ml subcutaneous injection of the antibody in the skin above the left quad muscle was  
3 performed. Blood draws were performed at pre-dose, 30 minutes, 4 hours, 24 hours, 48 hours,  
4 72 hours, 1 week, 2 weeks, 3 weeks, and 4 weeks after MAB273 administration in heparin  
5 tubes.

6  
7 In the immunogenicity study, animals were divided into two groups. In the therapeutic  
8 vaccination group, animals were immunized s.c. with 0.1 mg/kg Env peptides[24]  
9 (Pep1|YLRDQQLGIWG, Pep2|RQQQNLLRAIEA, Pep3|VYYGVPVWKEA,  
10 Pep4|LWDQSLKPCVKLT, Pep5|SVITQACSKVSFE, Pep6|GTGPCTNVSTVQC,  
11 Pep7|YKVVKIEPL, GenScript, New Jersey, U.S.) to establish low immunity during prime  
12 and boost (before 11 weeks). They thereafter received 1 mg/kg Env peptides plus 0.1 mg/kg  
13 MAB273 s.c. to measure the enhancement effect after exposure to the second boost (at 11  
14 weeks). In the prophylactic vaccination group, animals were co-injected with 0.1 mg/kg Env  
15 peptides and 0.1 mg/kg MAB273 s.c. after prime and boost (at 7 weeks) and with 1 mg/kg  
16 Env peptides and 0.1 mg/kg MAB273 s.c. during the second boost (at 11 weeks) and with 1  
17 mg/kg Env peptides, 0.1 mg/kg MAB273 and 100 µg Env protein (426c NFL trimer,  
18 provided by Richard Wyatt, Scripps Research) during the third boost (at 24 weeks). Blood  
19 draws were performed at pre-dose, 48 hours, 1 week, 2 weeks, 3 weeks, 7 weeks, 8 weeks, 9  
20 weeks, 11 weeks (48 hours after the 2<sup>nd</sup> boost time point was also sampled), 12 weeks, 13  
21 weeks after the first administration in heparin tubes, the prophylactic vaccination group was  
22 followed for additional 4 weeks. Bronchoalveolar lavage (BAL) sampling was performed as  
23 described previously[25] at 9 weeks and 13 weeks after the first administration.

24

1 For biodistribution assessment, three animals were immunized with 0.1 mg/kg Alexa Fluor  
2 680-labeled MAB273 and terminated after 24 (one animal) or 48 hours (two animals).  
3 Multiple samples were collected, such as skin biopsies from the site that received MAB273,  
4 the skin site on the contralateral leg that received saline, draining left and right inguinal LNs,  
5 left and right common iliac LNs, paraaortic LNs, mediastinal LNs, PBMCs, bone marrow,  
6 spleen, liver and BAL. The samples were processed into single-cell suspensions as described  
7 previously[26-28].

8

#### 9 *Safety clinical chemistry and hematology tests*

10 Hematological analyses of heparinized blood were performed within 8 h after collection on  
11 an Exigo Vet instrument (Model H400, Boule Diagnostics AB, Spånga, Sweden) after QC  
12 with use of Boule Vet Con control blood. Heparinized plasma samples were analyzed using  
13 an ABAXIS Vetscan VS2 3.1.35 Chemistry analyzer (Triolab, Solna, Sweden). Indicated  
14 parameters were analyzed on Mammalian Liver Profile rotors (Triolab), which have  
15 individual QC controls.

#### 16 *Blood sample processing*

17 PBMCs were isolated by Ficoll-Paque (GE Healthcare, Fairfield, CT) density gradient  
18 centrifugation of blood samples at 2200 rpm for 25 minutes with no brake or acceleration.  
19 PBMCs were washed and maintained in phosphate-buffered saline (PBS). Samples were  
20 stained immediately or frozen using 90% heat-inactivated fetal bovine serum (FBS) and 10%  
21 DMSO (Sigma-Aldrich) and stored at -170°C.

22

#### 23 *Flow cytometry for innate phenotyping*

24 In the *in vitro* assays, fresh PBMCs were exposed to antibodies for 2 hours at 4°C (CD40  
25 binding) or 24 hours at 37°C (activation) first. In the *in vivo* assays, fresh PBMCs were

1 stained with LIVE/DEAD™ Fixable Blue Dead Cell Stain Kit (Invitrogen, L23105), then  
2 blocked with FcR Blocking Reagent (Miltenyi Biotec, 130-059-901) according to  
3 manufacturer's protocol. Samples were then surfaced stained with a panel of fluorescent  
4 staining antibodies (Table S1). After staining and washing, PBMCs were resuspended in 1%  
5 paraformaldehyde (PFA) and acquired on an LSRFortessa flow cytometer (Fortessa, BD).  
6 Data analysis was performed using FlowJo v10.

7

#### 8 *Flow cytometry for labeled antibody tracking*

9 Single-cell suspensions from collected samples were stained with LIVE/DEAD then blocked  
10 with FcR Blocking. Cells were then surfaced stained with a panel of fluorescent staining  
11 antibodies (Table S1). After staining and washing, cells were spiked with AccuCount beads  
12 (Spherotech, ACBP-100-10) and resuspended in 1% PFA and acquired on an LSRFortessa  
13 flow cytometer. Counting bead normalized cell numbers were calculated according to the  
14 manufacturer's protocol.

15

#### 16 *Flow cytometry for detecting antigen-specific T cells*

17 Fresh PBMCs were stimulated with 2 µg/mL Env peptides or 10 µg/mL Env protein  
18 overnight at 37°C, BV421-CD107a staining antibody (BioLegend, 328626) was added during  
19 the incubation. On the next day, GolgiStop (Monensin, BD, 554724) and Golgi Plug  
20 (Brefeldin A, BD, 555029) were added 6 hours before staining according to manufacturer's  
21 protocol. The LIVE/DEAD staining was the same as above, samples were then surfaced  
22 stained, permeabilized with Cytofix/Cytoperm™ (BD, 554714), and intracellular staining  
23 performed (Table S1). After staining and washing, PBMCs were resuspended in 1% PFA and  
24 acquired on an LSRFortessa flow cytometer, the background was subtracted with  
25 unstimulated autologous controls.



1

2 *Flow cytometry for B cell proliferation*

3 Fresh PBMCs were labeled with 0.25 $\mu$ M CellTrace Violet (Invitrogen) at a cell concentration  
4 of 1 million/mL for 20 min at 37°C. Labeled PBMCs were stimulated with testing Abs. As  
5 controls, cells were stimulated with either 1 $\mu$ g/ml CpG B (Invivogen) or left unstimulated in  
6 complete media (RPMI1640, 10% FBS, 1% L-glutamine, 1% penicillin/streptomycin) and  
7 cultured for 5 days. After culture, cells were washed with PBS and stained with LIVE/DEAD  
8 and then blocked with FcR Blocking. Samples were then surfaced stained with a panel of  
9 fluorescent staining antibodies (Table S1). After staining and washing, PBMCs were  
10 resuspended in 1% PFA and acquired on an LSRFortessa flow cytometer.

11

12 *Flow cytometry for CD40L competition*

13 Fresh PBMCs were cultured with different concentration of MAB273, CP-870,893 or CD40L  
14 (ThermoFisher, 34-8902-81) for 20 minutes at 4°C then washed with cold PBS, 1  $\mu$ g/mL  
15 CD40L-biotin (ThermoFisher, 15836427) was added for 20 minutes at 4°C then washed with  
16 cold PBS. The LIVE/DEAD staining was the same as above, samples were then surfaced  
17 stained with a panel of fluorescent staining antibodies (Table S1). After staining and washing,  
18 PBMCs were resuspended in 1% PFA and acquired on an LSRFortessa flow cytometer.

19

20 *ELISA assay for CD40L competition*

21 Greiner-Bio One 96 well half-area ELISA plates (VWR, 738-0032) were coated overnight at  
22 4°C with 2  $\mu$ g/ml CD40 protein (ThermoFisher, A42565) in fresh PBS. The plates were  
23 blocked with PBS containing 5% (w/v) milk for 1 hour at room temperature (RT). Serially  
24 diluted MAB273, CP-870,893, or CD40L were added to plates and incubated for 2 hours at  
25 RT. Then, 2  $\mu$ g/mL CD40L-biotin was added to plates and incubated for 1 hours at RT. The

1 CD40L-biotin was detected by adding a 1:1,000 dilution of Streptavidin-HRP (Mabtech,  
2 3310-9-1000) and the signal was developed by addition of TMB substrate (BioLegend). The  
3 addition of an equal volume of 1M H<sub>2</sub>SO<sub>4</sub> stopped the reaction, and the optical density (OD)  
4 was read at 450 nm and background was read at 550 nm. The plates were washed 3 times  
5 between each incubation step using PBS supplemented with 0.05% Tween 20.

6

#### 7 *ELISA assay for CD40 binding*

8 ELISA plates were coated with 2 µg/ml CD40 protein and blocked as described above.  
9 Serially diluted MAB273, its Fab or F(ab')<sub>2</sub> fragments were added to plates and incubated  
10 for 2 hours at RT. The CD40 binding signal was detected by adding a 1:5,000 dilution of goat  
11 anti-human Fab/F(ab')<sub>2</sub> IgG secondary-HRP antibody (Jackson ImmunoResearch, 109-035-  
12 006) or a 1:20,000 dilution of goat anti-human Fc IgG secondary-HRP antibody (Jackson  
13 ImmunoResearch, 109-035-008) and the signal was developed as described above.

14

#### 15 *MAB273 fluorochrome-labeling*

16 MAB273 was labeled by using the Alexa Fluor™ 680 Protein Labeling Kit (ThermoFisher,  
17 A20172) according to manufacturer's protocols. The Alexa Fluor 680-conjugated MAB273  
18 was assessed for signal intensity and activation capacity by staining PBMCs overnight then  
19 acquire PBMCs on an LSRFortessa flow cytometer. The capacity to bind CD40 was tested by  
20 ELISA and compared to non-conjugated MAB273 as described above.

21

#### 22 *ELISA assay for detection of anti-MAB273 IgG in plasma*

23 ELISA plates were coated with 1 µg/ml MAB273 and blocked as described above. Serially  
24 diluted plasma samples were added to plates and incubated for 2 hours at RT. The anti-  
25 MAB273 IgG was detected by adding a 1:5,000 dilution of anti-macaque pan-species IgG

1 HRP antibody (Absolute Antibody, clone 1B3) and the signal was developed as described  
2 above.

3

4 *ELISA assay for detection of anti-Env peptides IgG*

5 ELISA plates were coated with 2 µg/ml NeutrAvidin (ThermoFisher, 31000) and blocked as  
6 described above. Then, 2 µg/mL biotin conjugated Env peptides (GenScript, customized)  
7 were added to plates and incubated for 1 hour at RT. Serially diluted plasma samples were  
8 added to plates and incubated for 2 hours at RT. The anti-Env peptides IgG was detected by  
9 adding a 1:5,000 dilution of polyclonal anti-monkey IgG HRP antibody (Nordic MUBio,  
10 GAMon/IgG(Fc)/PO) and the signal was developed as described above.

11

12 *ELISA assay for detection of anti-Env protein IgG*

13 ELISA plates were coated with 2 µg/ml mouse anti-His tag antibody (R&D Systems,  
14 MAB050) and blocked as described above. Then, 2 µg/mL Env protein (NFL 426c, His-tag)  
15 was added to plates and incubated for 1 hour at RT. Serially diluted plasma samples were  
16 added to plates and incubated for 2 hours at RT. The remaining steps are the same as above.

17

18 *ELISA assay for MAB273 pharmacokinetics analysis*

19 ELISA plates were coated with 2 µg/ml CD40 protein and blocked as described above.  
20 Serially diluted plasma was added to plates and incubated for 2 hours at RT. MAB273 was  
21 detected by adding a 1:5,000 dilution of monkey cross-adsorbed polyclonal goat anti-human  
22 IgG HRP antibody (Southern Biotech, 2049-05) and the signal was developed as described  
23 above.

24

25 *ELISA assays for detection of cytokines*

1 Supernatant from rhesus cell culture or rhesus plasma samples were evaluated for IL-12 p40,  
2 IL-6, IFN- $\gamma$  and TNF levels by ELISA kits (Mabtech, 3450-1H-6, 3460-1H-6, 3421M-1H-6,  
3 3512M-1H-6). Assays were performed according to manufacturer's protocols.

4

#### 5 *Bulk transcriptomics*

6 Skin punch biopsy (MAB273 injection site and saline injection site), inguinal lymph nodes  
7 (MAB273 injection site and saline injection site), and blood (pre-immunization and 24-48  
8 hours after immunization) samples were collected and preserved in RNAlater™ Stabilization  
9 Solution (ThermoFisher, AM7021) or PAXgene® Blood RNA Tube (BD, 762165). RNA  
10 isolation, library preparation, and sequencing were processed at the BEA core facility,  
11 Karolinska Institutet, using Illumina stranded mRNA prep kit. Illumina NovaSeq 6000  
12 platform was used to generate paired-end reads of 150 bp with an average sequencing depth  
13 of 40 million reads per sample. Samples were preprocessed using nf-core rnaseq pipeline  
14 (version 3.7), genome alignment was processed using STAR alignment (version 2.7.10a) to  
15 the *Macaca mulatta* genome (Mmul\_10) and quantification with Salmon (version 1.8.0).

16

#### 17 *RNA sequencing data analysis*

18 For this study, we used a customized bioinformatic analysis workflow of RNA sequencing  
19 data using R (version 4.1.2). Differential gene expression analysis was performed using  
20 DESeq2 (version 1.34.0). Gene Set Enrichment analysis was done with ClusterProfiler  
21 (version 4.2.2) package. The database used for gene set enrichment analysis was the Blood  
22 Transcriptome Modules (BTMs)[29]. To compare differentially expressed genes, Wald test  
23 was performed with multiple hypothesis testing controlling the false discovery rate (FDR)  
24 using the Benjamini-Hochberg procedure ( $q$ -value < 0.05).

25

1 *Statistics*

2 No statistical methods were used to predetermine sample size. A Wilcoxon matched-pairs  
3 signed-rank test was used when two groups were compared and a Friedman test was used  
4 when three or more groups were compared, the results were considered statistically  
5 significant when  $p < 0.05$ , indicated as  $*p < 0.05$  in the figures. Analyses were performed in  
6 GraphPad Prism 9.

7

8 **Results**

9 *MAB273 binds the CD40L binding site and activates immune cells*

10 Screening and identification of MAB273 have recently been described[23]. In this study, we  
11 focused on further functional characterization of MAB273. Since CP-870,893 is one of the  
12 most well-studied and potent CD40 antibodies in clinical development we used it as a  
13 comparator in the *in vitro* assays. CD40 binding capacity and activation were analyzed on  
14 multiple immune cells but we focused on B cells and myeloid dendritic cells (MDCs) within  
15 the PBMC population since they are central in immunity and express high levels of CD40  
16 (Figure S1A). Human PBMCs exposed to MAB273 or CP-870,893 were found to have  
17 markedly reduced signal of a CD40 staining antibody (clone: 5C3) confirming that they both  
18 compete for binding to CD40 in a dose dependent manner (Figure 1A). However, using a  
19 CD40L competition assay only MAB273 binding was affected demonstrating that the epitope  
20 specificity on CD40 is different between MAB273 and CP-870,893 and only MAB273 binds  
21 the CD40L binding site (Figure 1B). Regardless, both B cells and MDCs showed that they  
22 had upregulated the activation markers CD80, CD70 and lymph node homing marker CCR7  
23 after MAB273 or CP-870,893 exposure (Figures 1C and 1D). B cell proliferation, as assessed  
24 by dilution of CellTrace violet dye, also showed similar activation with MAB273 or CP-  
25 870,893 stimulation (Figure 1E). Although induction of phenotypic differentiation and cell

1 proliferation was clear with both MAB273 and CP-870,893, we did not find detectable  
2 cytokines such as IL-12 p40, IL-6, IFN- $\gamma$  and TNF in the cell culture supernatants after  
3 stimulation (data not shown).

4

#### 5 ***CD40 binding and activation capacities remain after removing the Fc region of MAB273***

6 In order to evaluate if MAB273 is Fc $\gamma$ R-independent and the role of avidity, we generated  
7 F(ab')<sub>2</sub> fragments by pepsin digestion to cleave off the Fc region but maintain the hinge  
8 region as well as Fab fragments by papain digestion to remove both the Fc region and hinge  
9 region (Figure 2A). We confirmed that the Fab and F(ab')<sub>2</sub> fragments of MAB273 still bound  
10 to CD40 but were not detected by an anti-Fc antibody (Figure 2B). Human B cells and MDCs  
11 exposed to MAB273 or the F(ab')<sub>2</sub> fragment showed similar ability to block the CD40  
12 staining antibody in a dose dependent manner, while the Fab fragment showed weaker CD40  
13 blocking capacity (Figure 2C). In addition, MAB273 and the F(ab')<sub>2</sub> exposure resulted in  
14 similar upregulation of CD80, CD70 and CCR7 on B cells (Figure 2D) and MDCs (Figure  
15 2E), while the Fab fragment retained the activation capacity on MDCs (Figure 2E) but was  
16 weaker for B cells (Figure 2D) suggesting that B cells may require higher avidity for  
17 activation (Figure S1A). In addition, B cell proliferation induced by MAB273 or F(ab')<sub>2</sub> was  
18 similar but Fab showed weaker induction (Figure 2F). This demonstrates that the F(ab')<sub>2</sub>  
19 fragment of MAB273 has retained immunostimulatory capacities *in vitro* after removing the  
20 Fc region, but the Fab fragment was less potent for B stimulation. Nevertheless, we conclude  
21 that MAB273-induced activation is not dependent on Fc $\gamma$ R crosslinking.

22

#### 23 ***MAB273 binds CD40 and activates rhesus macaque PBMCs in vitro***

24 With the further aim of utilizing a physiological *in vivo* animal model, we next tested the  
25 ability of MAB273 to bind and stimulate rhesus macaque PBMCs *in vitro* by repeating a

1 large subset of the above *in vitro* experiments. The immune cells expressed CD40 as  
2 expected where B cells and MDCs had the highest expression and T cells and neutrophils low  
3 expression (Figure S1B). Phenotypic differentiation after stimulation with MAB273, CP-  
4 870,893 or the isotype control antibody (IgG1-LALA) were analyzed. Again, the signal of  
5 the CD40 staining antibody was blocked when the cells had been exposed to MAB273 or CP-  
6 870,893 but not to the isotype control (Figures 3A and 3B). In addition, MAB273  
7 upregulated CD80 on B cells (Figure 3A) and MDCs (Figure 3B). Less upregulation was  
8 found by CP-870,893 and no upregulation was found by the isotype control antibody. B cell  
9 proliferation was also induced by MAB273 exposure but not by the isotype control antibody  
10 (Figure 3C). MAB273 induced low but detectable levels of IL-12 p40, IL-6 and TNF  
11 secretion (Figure 3D). IFN- $\gamma$  was not detected (data not shown). This shows that MAB273  
12 can bind to rhesus macaque CD40 and activate immune cells.

13

#### 14 ***MAB273 induces innate immune activity in vivo in rhesus macaques***

15 Six rhesus macaques were thereafter divided into three groups to receive MAB273  
16 administration at different doses and routes (Figure 4A). Standard clinical chemistry analyses,  
17 including a series of liver and kidney function and complete blood count (CBC)  
18 measurements were performed in addition to immunological analyses. The first group that  
19 received the highest dose of 1 mg/kg by intravenous (i.v.) administration showed that several  
20 clinical chemistry parameters including alkaline phosphatase (ALP), alanine transaminase  
21 (ALT), gamma-glutamyl transferase (GGT), bile acid (BA), total bilirubin (TBIL) and blood  
22 urea nitrogen (BUN) were elevated above the normal reference range (Figure S2A). This  
23 group also showed side effects characterized by loss of appetite and reduced activity behavior  
24 for up to 5 days. In contrast, the lower dose of 0.1 mg/kg given i.v. did not induce any  
25 detectable side effects and most of the clinical chemistry parameters remained within the

1 healthy range (Figure S2A). The low dose was thereafter tested with subcutaneous (s.c.)  
2 administration which neither induced side effects. As visualized by CBC, there were  
3 fluctuations of cell numbers following administration of MAB273 found with both doses and  
4 routes. A rapid decline in platelets was observed already at 0.5-4 hours accompanied by a  
5 rapid increase in white blood cell counts, especially granulocytes, was found after MAB273  
6 administration in all groups (Figure S2B). Frequencies of specific cell subsets identified by  
7 flow cytometry and normalized to the CBC data confirmed a rapid increase in neutrophils  
8 while there was a transient decline in both B cells and MDCs. The cell fluctuations were  
9 dose-dependent and with a notably more dramatic effect in the 1 mg/kg i.v. group (Figure  
10 S2C). The transient fluctuation of immune cells after MAB273 administration may stem from  
11 redistribution of activated cells leaving the circulation to migrate to tissues followed by a  
12 replenishment of cells from the bone marrow as has been proposed earlier[11, 22]. Body  
13 weight remained stable during the entire study period in all groups (Figure S2D).

14

15 Analysis of the pharmacokinetics (PK) of MAB273 in plasma showed that the levels were  
16 readily detectable after 0.5 hour of administration in both of the i.v. groups (Figure 4B). In  
17 the high dose group, the levels of MAB273 peaked around 0.5-4 hours and then declined  
18 gradually until it was undetectable after 2 weeks. In the low dose group, the highest level was  
19 detected at 0.5 hour, then continually decreased and was undetectable after 1 week. In the s.c.  
20 group, MAB273 was detectable at 0.5-4 hours but at 2-4 log lower levels compared to the i.v.  
21 groups. However, the level of MAB273 in the s.c. group was sustained for a week and  
22 undetectable at 2 weeks. This suggests that s.c. administration results in a depot effect and  
23 slower release of MAB273 into the circulation.

24



1 Binding of MAB273 to CD40 *in vivo* was evaluated by quantifying the loss of detection  
2 signal from the staining CD40 antibody as performed in the *in vitro* experiments. Rapidly  
3 (0.5 hour) after administration of MAB273, detection of CD40 was blocked on B cells and  
4 MDCs (Figure 4C). Lack of CD40 signal was sustained for 72 hours in the high dose i.v.  
5 group while this was found for a shorter period for the low dose i.v. group. The s.c. group  
6 also showed reduced signal for CD40, but this was noticed later (at 4 hours) and sustained for  
7 2 weeks in line with the observed pharmacokinetics of MAB273 in plasma. As mentioned  
8 above, the return of detectable CD40 expression may be due to replenishment of new cells  
9 into the circulation as well as the half-life of MAB273. Accompanied with MAB273 binding  
10 to CD40 on immune cells, a rapid increase in CD80 and CCR7 expression was observed  
11 especially in i.v. groups (Figure 4D). The expression gradually returned to baseline levels or  
12 even below which may be explained by that newly recruited cells exhibit a more immature  
13 phenotype. The upregulation of CD80 and CCR7 on MDCs was less noticeable than on B  
14 cells (Figure 4E). Secretion of IL-12 p40, IL-6 and IFN- $\gamma$  was detected in one of the animals  
15 receiving the high dose while most animals did not show detectable levels (Figure 4F). TNF  
16 was not detected (data not shown). In conclusion, MAB273 induces strong innate immune  
17 activation with regards to cell recruitment and activation while being well-tolerated at the  
18 dose of 0.1 mg/kg given either i.v. or s.c. in rhesus macaques. Since s.c. administration  
19 demonstrated clear immune stimulation while potentially offering a depot effect of MAB273  
20 for slower release and better tolerability, this route may be more attractive for clinical  
21 development and hence this was used in our subsequent studies.

22

23 ***MAB273 targets and activates immune cells at the site of injection and draining lymph***  
24 ***nodes***

1 To understand the biodistribution of MAB273 in different tissues after administration, the  
2 antibody was labeled with AlexaFluor 680 fluorochrome to enable tracking *in vivo*. The  
3 fluorescent signal and unaltered CD40 binding and activation capacities of the labeled  
4 MAB273 were validated *in vitro* before administered *in vivo* (Figures S3A-S3C). Three  
5 animals were immunized s.c. and biopsies were collected after 24 (n=1) or 48 hours (n=2)  
6 from the sites of injection, lymph nodes (LNs) and other selected tissues (Figure 5A).  
7 MAB273-AlexaFluor 680 was predominantly detected at the site of injection (skin of the left  
8 thigh) and the LNs specifically draining this site (left inguinal LNs, left common iliac LNs  
9 and paraaortic LNs). Monocytes, B cells, neutrophils, MDCs, PDCs and macrophages  
10 showed detectable MAB273 binding while T cells had no signal (Figure 5B). MAB273 signal  
11 was not detected at the saline control injection site in the skin of the opposite thigh (right) and  
12 the LNs draining this site (right inguinal LNs and right common iliac LNs). No or very weak  
13 signal was detected in draining peripheral tissues such as the liver, spleen, bone marrow,  
14 BAL and PBMCs (Figure 5B and S3D). There were more CD45+ immune cells targeted with  
15 MAB273 at the injection site and the primary LNs compared to the secondary draining LNs  
16 more distant from the injection site (Figure 5C). In the skin, the most abundant cell subsets  
17 targeted with MAB273 were macrophages, neutrophils and monocytes likely due to CD40  
18 expression and phagocytic ability[30-32]. In the draining LNs, B cells were predominantly  
19 targeted with MAB273 likely due to that they represent a major CD40 expressing  
20 population[33-35] (Figure 5D). In line with the detectable signal of the MAB273, there was  
21 considerable infiltration of immune cells to the injection site in the skin compared to the  
22 saline-injection sites. This consisted of mainly infiltrating B cells, MDCs, monocytes,  
23 neutrophils and T cells (Figures 3E-3G). Again, reduced CD40 staining signal was observed  
24 at the injection site, draining LNs and PBMCs indicative of MAB273 binding to CD40  
25 expressing cells as expected (Figures 5E and 5F). We therefore concluded that MAB273 has

1 restricted biodistribution to the site of injection and specific draining LNs and targets

2 multiple cell subsets but to the highest degree B cells, DCs and macrophages.

3

4 ***Strong induction of genes associated with innate immune stimulation in MAB273 targeted***  
5 ***tissues***

6 To further understand the immune activation profile induced by MAB273 administration *in*  
7 *vivo*, we performed RNA sequencing analyses on the draining LNs and skin from the site of  
8 injection as well as the blood (Figure 6A). This revealed a significant number of differentially  
9 expressed genes (DEGs) in the MAB273 targeted skin and LNs compared to the donor-  
10 matched saline control sites (Figures 6B and 6C). In addition, blood taken before MAB273  
11 administration compared to 24-48 hours after showed significant gene modulation (Figure  
12 6D).

13

14 Gene set enrichment analysis using the blood transcription modules (BTMs) described  
15 previously[29] demonstrated that distinctly different gene modules were changed at the  
16 different anatomical sites. The skin had the highest activation and transcriptional changes  
17 after MAB273 injection. The upregulated genes in skin included sets of genes associated with  
18 specific cell surface markers (*CD19*, *CD2*, *IL21R*) and chemokines such as the *CXCR5* gene.  
19 All the significantly enriched gene modules were upregulated, except the cell cycle modules.  
20 The results indicated activation and recruitment of T cells, B cells, NK cells, monocytes, and  
21 DCs to the site of injection (Figure 6B). MAB273-draining LNs also showed that there were  
22 genes upregulated compared to the saline-draining LNs. These genes were fewer and were  
23 distinct from those observed in the skin. The upregulated genes in the LNs were mainly  
24 linked to antigen presentation (*IRAG2*) and interferon (*IRF6*), and a few downregulated genes  
25 were linked to RNA processing (*U2*, *U3*, *U4*, *RNaseP*). The enrichment analysis indicated an

1 upregulation of modules related to cell proliferation (mitotic cell division and cell cycle  
2 modules) (Figure 6C). Furthermore, in the blood, the genes differentially expressed 24-48  
3 hours after MAB273 administration were mainly associated with interferon signatures, such  
4 as *ISG15*, *RSAD2*, and *SKIV2L* as well as genes associated with monocytes and DC  
5 activation (Figure 6D). MAB273 therefore induces significant innate immune activation  
6 characterized by monocyte and DC activation in the blood, recruitment of immune cells to  
7 the site of injection while cell proliferation and antigen presentation processes were more  
8 dominant in the draining LNs.

9

#### 10 ***MAB273 exhibits adjuvant effects for induction of antigen-specific CD4 and CD8 T cells***

11 Finally, we evaluated the effect of MAB273 to act as an adjuvant both for therapeutic  
12 vaccination where low degree of immunity already exists and also to enhance primary  
13 immune responses as in prophylactic vaccination. Three animals therefore first received  
14 seven well characterized HIV-1 envelope glycoprotein (Env) peptides[24] as model antigen  
15 alone two times to establish low levels of immunity before receiving boost immunizations  
16 with MAB273 co-administered s.c. to mimic a therapeutic vaccination (Figure 7A). In a  
17 separate group, three animals received MAB273 together with the Env peptides in a prime-  
18 boost schedule of four immunizations to mimic prophylactic vaccination. The final  
19 immunization was performed with an additional recombinant trimer Env protein (Figure 7A).

20

21 Low frequencies of Env-specific T cell responses were induced by Env peptide immunization  
22 alone (Figure 7B). The responses were enhanced in two out of three animals when they  
23 received a boost with Env peptides and MAB273. This effect was evident for both systemic  
24 Env-specific CD4 and CD8 T cells in blood (Figure 7B) as well as in bronchoalveolar lavage  
25 (BAL) (Figure 7B). Two out of the three animals immunized with Env peptides in

1 combination with MAB273 already at prime immunization induced higher levels of Env-  
2 specific CD4 and CD8 T cell responses compared to the animals receiving Env peptides only  
3 (Figures 7B and 7C). Although the subsequent boost immunizations re-activated T cell  
4 responses, they did not reach the peak levels found after the prime immunization (Figure 7C).  
5 This was observed both in blood and BAL and may be a consequence of the low dose of Env  
6 peptides (0.1 mg/kg) and the induction of antibodies against the humanized MAB273 in  
7 rhesus macaques (Figures S4A and S4B).

8  
9 The activation profile of MAB273 based on the RNA sequencing and blood transcriptome  
10 analysis comparing the activation at pre-immunization compared to the second boost showed  
11 that the differences were negligible indicating that recurrent MAB273 administration may  
12 result in lower innate immune activation (Figure S4C). Nevertheless, reactivation of memory  
13 T cell responses to peak levels occurred after the fourth immunization of MAB273 when  
14 using trimer Env protein in combination with Env peptides to provide more antigen (Figure  
15 7C). No detectable IgG to Env peptides was found (Figure S4D) but IgG to Env protein was  
16 detected (Figure S4E). Taken together, our study demonstrates that MAB273 is a potent  
17 agonistic anti-CD40 antibody with rapid binding and activation to B cells and MDCs *in vitro*  
18 and *in vivo* in rhesus macaques and can help enhance antigen-specific T cell responses.

19

## 20 **Discussion**

21 This study provides evidence that MAB273 binds to CD40 and activates human and rhesus  
22 macaque B cells and MDCs *in vitro* and in rhesus macaques *in vivo*. In particular, MAB273  
23 activates CD40 signaling to upregulate T cell costimulatory receptors CD80 and CD70 and  
24 LN homing receptor CCR7 on APCs which aids in driving T cell responses as shown by  
25 induction of both systemic (blood) and tissue (BAL) immunity. This is in line with what has

1 been reported with other potent anti-CD40 agonistic antibodies[11, 22, 26, 36-39]. However,  
2 MAB273 binds to the CD40L binding site of CD40 and exerts its biological activity  
3 independent of Fc $\gamma$ R crosslinking which is a unique combined feature.  
4  
5 Structure analysis has demonstrated that a symmetric complex between trimeric CD40L and  
6 dimers of CD40 is formed when they interact[40, 41]. CD40 signaling requires large clusters  
7 of these complexes[42, 43]. However, CD40L has also been reported to interact with several  
8 integrins independent of CD40-CD40L interaction[44, 45]. In fact, multiple CD40L binding  
9 sites for integrins may form even larger (anti-CD40 antibody)-CD40-CD40L-intergrin  
10 complexes that induce additional biological activities than the canonical CD40 activation  
11 which could enhance unwanted side effects[46-50]. Based on this, we screened and  
12 developed a series of antibodies, including MAB273, which can effectively replace CD40L  
13 and potentially avoid interference by additional CD40-CD40L-intergrin complex  
14 formation[23]. Our results confirmed that MAB273 binds to the CD40L binding site. Earlier  
15 studies have shown that APX005M, a mAb competing with the CD40L binding site, is highly  
16 agonistic and may activate CD40 similarly to endogenous CD40L[22, 51].  
17  
18 CD40 signaling induced by agonistic anti-CD40 antibodies has been shown to depend on  
19 cells expressing Fc-receptors[18]. In this regard, engineering the Fc region of agonistic CD40  
20 antibodies to promote the Fc $\gamma$ R crosslinking can enhance their potency[18-22], but increased  
21 crosslinking also augments adverse events[20, 21]. However, agonistic anti-CD40 antibodies  
22 of the IgG2 isotype show Fc-independent activity[38, 52]. This is likely provided by  
23 conformational regulation and flexibility of disulfide bonds in the hinge region[52, 53] which  
24 facilitates CD40 clustering[42, 43] in contrast to the IgG1 isotype which has an unfixed hinge  
25 region and highly flexible Fab arms. However, there are also opposite results showing that

1 the activity of IgG2 isotype antibody is not Fc-independent[20]. Taken together, at least in  
2 terms of the IgG1 isotype, functional Fc region and Fc $\gamma$ R crosslinking are considered  
3 necessary for strong CD40 agonists. However, our results with MAB273 demonstrate, both *in*  
4 *vitro* and *in vivo*, that it is possible for agonistic CD40 antibodies to be of the IgG1 isotype  
5 and function independently of Fc $\gamma$ R crosslinking[16]. We have earlier found that the Fc-  
6 silenced MAB273 induced more potent immune activity than several variants of CP-870,893,  
7 including the strongest Fc-enhanced crosslinking antibody CP-870,893 IgG1-V11[23], which  
8 supports the notion that epitope binding site is critical. Moreover, in this study we observed  
9 that only bivalent F(ab')<sub>2</sub>, and not monovalent Fab, showed similar agonistic activity as  
10 complete MAB273. This suggests that clustering of CD40 by bivalent Fab arms is a critical  
11 component of activation and may explain why IgG2 agonists retain activity without Fc  
12 engagement[39, 42, 52]. Still, various published agonistic CD40 antibodies show different or  
13 even completely opposite functions in terms of CD40L-binding site specificity and Fc $\gamma$ R  
14 crosslinking[11, 16, 22, 37, 38].

15

16 We tested MAB273 in rhesus macaques in order to mimic the human immune system as  
17 closely as possible. This was partly driven by that agonistic CD40 antibodies have distinct  
18 characteristics in mice and humans[16] and human Fc $\gamma$ Rs are different from mouse  
19 Fc $\gamma$ Rs[54]. Previous studies have mostly used human CD40 transgenic (hCD40Tg) mice[37,  
20 55], hCD40Tg Fc $\gamma$ RIIb<sup>-/-</sup> mice[52], hCD40Tg Fc $\gamma$ R<sup>-/-</sup> mice[43] or hCD40Tg/mFcgr2b<sup>-/-</sup>  
21 /hFcgr2b<sup>+/-</sup> mice[42]. However, it has been proposed that only humanized CD40/Fc $\gamma$ R mice  
22 can provide the correct *in vivo* environment for evaluating CD40 antibodies[20]. On the other  
23 hand, despite that macaque Fc $\gamma$ RIIb binds poorly to human antibodies[54], non-human  
24 primates (NHPs) are the preferred preclinical model[22, 26, 27, 38] due to their  
25 immunophenotypic similarity and CD40 homology to humans. To this end, a preclinical

1 study of an Fc-unmodified CD40 agonist, CDX-1140, showed that the agonistic activity is  
2 Fc-independent and well-tolerated in NHPs[38]. However, the Fc region of CDX-1140 is still  
3 functional and thus NHPs may not accurately predict activity, toxicity, or Fc-independence in  
4 humans. Since MAB273 has double LALA (L234A and L235A)-mutations to completely  
5 eliminate Fc-Fc $\gamma$ R binding, the NHP model should largely reflect the activity in humans in  
6 this regard. This is also supported by that CD40-binding and activation in human and rhesus  
7 cells showed similar results *in vitro*. Previous studies demonstrated that LALA critically  
8 reduces the binding of the Fc region to all known Fc $\gamma$ Rs and the complement component 1q  
9 (C1q). As a result, antibody-dependent cellular cytotoxicity (ADCC) and complement-  
10 dependent cytotoxicity (CDC) are not induced[56-58]. LALA has no effect on serum  
11 clearance[59], nor on PK[60].

12  
13 Our dose escalation results showed that 1 mg/kg i.v. gave side effects by transient elevation  
14 of liver transaminases and behavioral changes like reduced appetite and physical activity,  
15 while 0.1 mg/kg did not but still induced robust immune activation. The peak of liver  
16 transaminases appeared on day 7 and normalized by day 21 which is delayed compared to  
17 results reported for CP-870,893, which appeared between day 2-8[11]. We noted that  
18 MAB273 induced transient liver abnormality similar to reported by other agonistic CD40  
19 antibodies[11, 21, 26] which may be caused by apoptosis of CD40 expressing hepatocytes  
20 and CD40-mediated hyperactivation[11, 61]. However, hepatic toxicity can often be  
21 controlled by dose and route of administration as indicated by our results showing that the  
22 dose of 0.1 mg/kg did not cause changes in liver function. By tracking fluorescently labeled  
23 MA273 after s.c. administration, we also observed almost no fluorescent signal in the liver.  
24 We have earlier shown that i.v. administration of another CD40 antibody resulted on  
25 distribution in the liver[26, 27]. The transient increase of blood urea nitrogen (BUN) in 1



1 mg/kg i.v. group could be explained by the difficulty of renal excretion induced by  
2 macromolecular drugs (such as antibodies) and consequential renal inflammatory  
3 responses[62]. Transient hematologic changes were also observed after administration and  
4 aligned well with the pharmacokinetics of MAB273 in all groups in our study. In particular,  
5 the number of B cells and MDCs decreased in blood. Also, a rapid decline in platelets at 0.5  
6 hour was found, likely caused by activation of CD40-expressing platelets and their  
7 contribution to inflammation and aggregation[44, 63]. Our *in vitro* and RNA sequencing  
8 results also suggested that MAB273 can induce B cell proliferation similarly to other  
9 studies[26, 37, 38]. The downregulation of the B cell enrichment module in the blood and  
10 concomitant upregulation in the skin followed the change in cell numbers and suggest an  
11 extravasation and replenishment of immune cells induced by CD40 activation, as has been  
12 proposed earlier[11, 22, 38, 42]. The rapid increase in numbers of granulocytes, especially  
13 neutrophils, at 0.5 hour to 4 hours likely contributed to most of the observed enrichment in  
14 inflammation signatures. The 1 mg/kg i.v. group showed overall higher magnitude and longer  
15 duration of inflammation but 0.1 mg/kg given s.c. induced larger fluctuations in cell numbers  
16 in blood than 0.1 mg/kg i.v.. This may be caused by that s.c. administration also stimulated  
17 cells locally in the skin which resulted in more redistribution of neutrophils[64].  
18  
19 Anti-drug antibodies (ADA), such as the anti-MAB273 IgG observed in our study, are  
20 antibodies raised to the administered human antibodies and have often not been controlled for  
21 in earlier CD40 antibody studies. Induction of ADA has frequently been reported with a  
22 variety of other human antibodies administered to macaques[65-67]. ADA may result in  
23 reduced potency of the CD40 antibodies during subsequent administrations and affect the  
24 accuracy of conclusions drawn from sequential dosing, even when using humanized  
25 CD40/Fc $\gamma$ R mice as the animal model. The ADA we observed after each immunization may

1 have interfered with the efficiency of the boost immunizations. Nevertheless, boosting of  
2 antigen-specific T cell responses could be detected after each immunization and especially  
3 when a higher antigen dose including Env protein was given. Additional studies using more  
4 animals and an optimal dose of antigen, perhaps as well as using a rhesus version of  
5 MAB273, are needed to assess the enhancement of T cell responses by the adjuvant effect of  
6 MAB273.

7  
8 In summary, our study shows the safety, cell targeting and immunostimulatory properties of  
9 this novel agonistic anti-CD40 antibody of IgG1 isotype that is CD40L binding site specific  
10 and works independently of Fc $\gamma$ R crosslinking. These are distinct features from previously  
11 reported agonistic anti-CD40 antibodies and may therefore offer new avenues for the  
12 adjuvant targeting of the CD40:CD40L pathway.

#### 13 14 **Acknowledgements**

15 We thank Richard Wyatt, Shridhar Bale and Richard Wilson (Scripps Research, California,  
16 United States) for kindly providing the 426c NFL trimer of Env protein.

#### 17 18 **Author contributions**

19 Conceptualization – X.Y., S.O., J.F., D.P., U.P., S.F., K.L.; Formal Analysis – X.Y., S.O.,  
20 R.A., K.Y., K.L.; Funding acquisition – J.F., D.P., U.P., S.F., K.L.; Investigation – X.Y.,  
21 S.O., R.A., K.Y., K.Le., F.H., A.C.; Methodology – X.Y., S.O., R.A., K.Le., F.H., A.C., K.Y.,  
22 M.B., F.N., J.F., D.P., U.P., S.F., K.L.; Resources – F.N., J.F., D.P., U.P., S.F., K.L.;  
23 Supervision – K.L.; Visualization – X.Y., R.A., K.Y.; Writing – original draft – X.Y., K.L.;  
24 Writing – review & editing – all authors.

25

1 **Funding**

2 This work was supported by Icano MAB GmbH and grants from the Swedish Research  
3 Council (Vetenskapsrådet; 2019-01036 and 2020-05829 to K.L.). This research was also  
4 supported by a grant from the China Scholarship Council (X.Y.) and intramural faculty salary  
5 grants from Karolinska Institutet (S.O., K.Le., F.H.).

6

7 **Data availability**

8 The datasets generated during and/or analysed during the current study are available from the  
9 corresponding author on reasonable request. The manuscript has data included as electronic  
10 supplementary material.

11

12 **Declaration of interests statement**

13 J.F., D.P., U.P., S.F. are employees of Icano MAB GmbH. All other authors declare no  
14 competing interests.

## 1 **References**

- 2 1. Zhang H, Dai Z, Wu W, Wang Z, Zhang N, Zhang L, et al (2021) Regulatory mechanisms  
3 of immune checkpoints PD-L1 and CTLA-4 in cancer. *J Exp Clin Cancer Res* 40(1):184.  
4 <https://doi.org/10.1186/s13046-021-01987-7>
- 5 2. Rowshanravan B, Halliday N, Sansom DM (2018) CTLA-4: a moving target in  
6 immunotherapy. *Blood* 131(1):58-67. <https://doi.org/10.1182/blood-2017-06-741033>
- 7 3. Boutros C, Tarhini A, Routier E, Lambotte O, Ladurie FL, Carbonnel F, et al (2016) Safety  
8 profiles of anti-CTLA-4 and anti-PD-1 antibodies alone and in combination. *Nat Rev Clin*  
9 *Oncol* 13(8):473-86. <https://doi.org/10.1038/nrclinonc.2016.58>
- 10 4. Vonderheide RH (2018) The Immune Revolution: A Case for Priming, Not Checkpoint.  
11 *Cancer Cell* 33(4):563-9. <https://doi.org/10.1016/j.ccell.2018.03.008>
- 12 5. Elgueta R, Benson MJ, de Vries VC, Wasiuk A, Guo Y, Noelle RJ (2009) Molecular  
13 mechanism and function of CD40/CD40L engagement in the immune system. *Immunol Rev*  
14 229(1):152-72. <https://doi.org/10.1111/j.1600-065X.2009.00782.x>
- 15 6. van Kooten C, Banchereau J (2000) CD40-CD40 ligand. *J Leukoc Biol* 67(1):2-17.  
16 <https://doi.org/10.1002/jlb.67.1.2>
- 17 7. French RR, Chan HT, Tutt AL, Glennie MJ (1999) CD40 antibody evokes a cytotoxic T-  
18 cell response that eradicates lymphoma and bypasses T-cell help. *Nat Med* 5(5):548-53.  
19 <https://doi.org/10.1038/8426>
- 20 8. Bennett SR, Carbone FR, Karamalis F, Flavell RA, Miller JF, Heath WR (1998) Help for  
21 cytotoxic-T-cell responses is mediated by CD40 signalling. *Nature* 393(6684):478-80.  
22 <https://doi.org/10.1038/30996>
- 23 9. Diehl L, den Boer AT, Schoenberger SP, van der Voort EI, Schumacher TN, Melief CJ, et  
24 al (1999) CD40 activation in vivo overcomes peptide-induced peripheral cytotoxic T-

- 1 lymphocyte tolerance and augments anti-tumor vaccine efficacy. *Nat Med* 5(7):774-9.
- 2 <https://doi.org/10.1038/10495>
- 3 10. Vonderheide RH (2020) CD40 Agonist Antibodies in Cancer Immunotherapy. *Annu Rev*
- 4 *Med* 71:47-58. <https://doi.org/10.1146/annurev-med-062518-045435>
- 5 11. Vonderheide RH, Flaherty KT, Khalil M, Stumacher MS, Bajor DL, Hutnick NA, et al
- 6 (2007) Clinical activity and immune modulation in cancer patients treated with CP-870,893,
- 7 a novel CD40 agonist monoclonal antibody. *J Clin Oncol* 25(7):876-83.
- 8 <https://doi.org/10.1200/jco.2006.08.3311>
- 9 12. Beatty GL, Torigian DA, Chiorean EG, Saboury B, Brothers A, Alavi A, et al (2013) A
- 10 phase I study of an agonist CD40 monoclonal antibody (CP-870,893) in combination with
- 11 gemcitabine in patients with advanced pancreatic ductal adenocarcinoma. *Clin Cancer Res*
- 12 19(22):6286-95. <https://doi.org/10.1158/1078-0432.Ccr-13-1320>
- 13 13. Vonderheide RH, Burg JM, Mick R, Trosko JA, Li D, Shaik MN, et al (2013) Phase I
- 14 study of the CD40 agonist antibody CP-870,893 combined with carboplatin and paclitaxel in
- 15 patients with advanced solid tumors. *Oncoimmunology* 2(1):e23033.
- 16 <https://doi.org/10.4161/onci.23033>
- 17 14. Bajor DL, Xu X, Torigian DA, Mick R, Garcia LR, Richman LP, et al (2014) Immune
- 18 activation and a 9-year ongoing complete remission following CD40 antibody therapy and
- 19 metastasectomy in a patient with metastatic melanoma. *Cancer Immunol Res* 2(11):1051-8.
- 20 <https://doi.org/10.1158/2326-6066.Cir-14-0154>
- 21 15. Rüter J, Antonia SJ, Burris HA, Huhn RD, Vonderheide RH (2010) Immune modulation
- 22 with weekly dosing of an agonist CD40 antibody in a phase I study of patients with advanced
- 23 solid tumors. *Cancer Biol Ther* 10(10):983-93. <https://doi.org/10.4161/cbt.10.10.13251>

- 1 16. Richman LP, Vonderheide RH (2014) Role of crosslinking for agonistic CD40  
2 monoclonal antibodies as immune therapy of cancer. *Cancer Immunol Res* 2(1):19-26.  
3 <https://doi.org/10.1158/2326-6066.Cir-13-0152>
- 4 17. White AL, Chan HT, French RR, Beers SA, Cragg MS, Johnson PW, et al (2013)  
5 Fc $\gamma$ RIIB controls the potency of agonistic anti-TNFR mAbs. *Cancer Immunol Immunother*  
6 62(5):941-8. <https://doi.org/10.1007/s00262-013-1398-6>
- 7 18. White AL, Chan HT, Roghanian A, French RR, Mockridge CI, Tutt AL, et al (2011)  
8 Interaction with Fc $\gamma$ RIIB is critical for the agonistic activity of anti-CD40 monoclonal  
9 antibody. *J Immunol* 187(4):1754-63. <https://doi.org/10.4049/jimmunol.1101135>
- 10 19. Li F, Ravetch JV (2011) Inhibitory Fc $\gamma$  receptor engagement drives adjuvant and anti-  
11 tumor activities of agonistic CD40 antibodies. *Science* 333(6045):1030-4.  
12 <https://doi.org/10.1126/science.1206954>
- 13 20. Dahan R, Barnhart BC, Li F, Yamniuk AP, Korman AJ, Ravetch JV (2016) Therapeutic  
14 Activity of Agonistic, Human Anti-CD40 Monoclonal Antibodies Requires Selective Fc $\gamma$ R  
15 Engagement. *Cancer Cell* 29(6):820-31. <https://doi.org/10.1016/j.ccell.2016.05.001>
- 16 21. Knorr DA, Dahan R, Ravetch JV (2018) Toxicity of an Fc-engineered anti-CD40  
17 antibody is abrogated by intratumoral injection and results in durable antitumor immunity.  
18 *Proc Natl Acad Sci U S A* 115(43):11048-53. <https://doi.org/10.1073/pnas.1810566115>
- 19 22. Filbert EL, Björck PK, Srivastava MK, Bahjat FR, Yang X (2021) APX005M, a CD40  
20 agonist antibody with unique epitope specificity and Fc receptor binding profile for optimal  
21 therapeutic application. *Cancer Immunol Immunother* 70(7):1853-65.  
22 <https://doi.org/10.1007/s00262-020-02814-2>
- 23 23. Reitingner C, Beckmann K, Carle A, Bluemle E, Jurkschat N, Paulmann C, et al (2023)  
24 Fc $\gamma$  receptor-independent controlled activation of CD40 canonical signaling by novel

- 1 therapeutic antibodies for cancer therapy. bioRxiv:2023.01.16.521736.
- 2 <https://doi.org/10.1101/2023.01.16.521736>
- 3 24. Nehete PN, Nehete BP, Hill L, Manuri PR, Baladandayuthapani V, Feng L, et al (2008)
- 4 Selective induction of cell-mediated immunity and protection of rhesus macaques from
- 5 chronic SHIV(KU2) infection by prophylactic vaccination with a conserved HIV-1 envelope
- 6 peptide-cocktail. *Virology* 370(1):130-41. <https://doi.org/10.1016/j.virol.2007.08.022>
- 7 25. Lenart K, Hellgren F, Ols S, Yan X, Cagigi A, Cerveira RA, et al (2022) A third dose of
- 8 the unmodified COVID-19 mRNA vaccine CVnCoV enhances quality and quantity of
- 9 immune responses. *Mol Ther Methods Clin Dev* 27:309-23.
- 10 <https://doi.org/10.1016/j.omtm.2022.10.001>
- 11 26. Thompson EA, Liang F, Lindgren G, Sandgren KJ, Quinn KM, Darrah PA, et al (2015)
- 12 Human Anti-CD40 Antibody and Poly IC:LC Adjuvant Combination Induces Potent T Cell
- 13 Responses in the Lung of Nonhuman Primates. *J Immunol* 195(3):1015-24.
- 14 <https://doi.org/10.4049/jimmunol.1500078>
- 15 27. Thompson EA, Darrah PA, Foulds KE, Hoffer E, Caffrey-Carr A, Norenstedt S, et al
- 16 (2019) Monocytes Acquire the Ability to Prime Tissue-Resident T Cells via IL-10-Mediated
- 17 TGF- $\beta$  Release. *Cell Rep* 28(5):1127-35.e4. <https://doi.org/10.1016/j.celrep.2019.06.087>
- 18 28. Ols S, Yang L, Thompson EA, Pushparaj P, Tran K, Liang F, et al (2020) Route of
- 19 Vaccine Administration Alters Antigen Trafficking but Not Innate or Adaptive Immunity.
- 20 *Cell Rep* 30(12):3964-71.e7. <https://doi.org/10.1016/j.celrep.2020.02.111>
- 21 29. Li S, Roupheal N, Duraisingham S, Romero-Steiner S, Presnell S, Davis C, et al (2014)
- 22 Molecular signatures of antibody responses derived from a systems biology study of five
- 23 human vaccines. *Nat Immunol* 15(2):195-204. <https://doi.org/10.1038/ni.2789>
- 24 30. Buhtoiarov IN, Lum H, Berke G, Paulnock DM, Sondel PM, Rakhmilevich AL (2005)
- 25 CD40 ligation activates murine macrophages via an IFN-gamma-dependent mechanism

- 1 resulting in tumor cell destruction in vitro. *J Immunol* 174(10):6013-22.
- 2 <https://doi.org/10.4049/jimmunol.174.10.6013>
- 3 31. Beatty GL, Chiorean EG, Fishman MP, Saboury B, Teitelbaum UR, Sun W, et al (2011)
- 4 CD40 agonists alter tumor stroma and show efficacy against pancreatic carcinoma in mice
- 5 and humans. *Science* 331(6024):1612-6. <https://doi.org/10.1126/science.1198443>
- 6 32. Salomon R, Rotem H, Katzenelenbogen Y, Weiner A, Cohen Saban N, Feferman T, et al
- 7 (2022) Bispecific antibodies increase the therapeutic window of CD40 agonists through
- 8 selective dendritic cell targeting. *Nat Cancer* 3(3):287-302. [https://doi.org/10.1038/s43018-](https://doi.org/10.1038/s43018-022-00329-6)
- 9 [022-00329-6](https://doi.org/10.1038/s43018-022-00329-6)
- 10 33. De Silva NS, Klein U (2015) Dynamics of B cells in germinal centres. *Nat Rev Immunol*
- 11 15(3):137-48. <https://doi.org/10.1038/nri3804>
- 12 34. Mesin L, Ersching J, Victora GD (2016) Germinal Center B Cell Dynamics. *Immunity*
- 13 45(3):471-82. <https://doi.org/10.1016/j.immuni.2016.09.001>
- 14 35. Young C, Brink R (2021) The unique biology of germinal center B cells. *Immunity*
- 15 54(8):1652-64. <https://doi.org/10.1016/j.immuni.2021.07.015>
- 16 36. Carpenter EL, Mick R, Rüter J, Vonderheide RH (2009) Activation of human B cells by
- 17 the agonist CD40 antibody CP-870,893 and augmentation with simultaneous toll-like
- 18 receptor 9 stimulation. *J Transl Med* 7:93. <https://doi.org/10.1186/1479-5876-7-93>
- 19 37. Mangsbo SM, Broos S, Fletcher E, Veitonmäki N, Furebring C, Dahlén E, et al (2015)
- 20 The human agonistic CD40 antibody ADC-1013 eradicates bladder tumors and generates T-
- 21 cell-dependent tumor immunity. *Clin Cancer Res* 21(5):1115-26.
- 22 <https://doi.org/10.1158/1078-0432.Ccr-14-0913>
- 23 38. Vitale LA, Thomas LJ, He LZ, O'Neill T, Widger J, Crocker A, et al (2019) Development
- 24 of CDX-1140, an agonist CD40 antibody for cancer immunotherapy. *Cancer Immunol*
- 25 *Immunother* 68(2):233-45. <https://doi.org/10.1007/s00262-018-2267-0>



- 1 39. Yu X, Chan HTC, Orr CM, Dadas O, Booth SG, Dahal LN, et al (2018) Complex  
2 Interplay between Epitope Specificity and Isotype Dictates the Biological Activity of Anti-  
3 human CD40 Antibodies. *Cancer Cell* 33(4):664-75.e4.  
4 <https://doi.org/10.1016/j.ccell.2018.02.009>
- 5 40. Naismith JH, Devine TQ, Brandhuber BJ, Sprang SR (1995) Crystallographic evidence  
6 for dimerization of unliganded tumor necrosis factor receptor. *J Biol Chem* 270(22):13303-7.  
7 <https://doi.org/10.1074/jbc.270.22.13303>
- 8 41. Vanamee É S, Faustman DL (2018) Structural principles of tumor necrosis factor  
9 superfamily signaling. *Sci Signal* 11(511). <https://doi.org/10.1126/scisignal.aao4910>
- 10 42. Yu X, Chan HTC, Fisher H, Penfold CA, Kim J, Inzhelevskaya T, et al (2020) Isotype  
11 Switching Converts Anti-CD40 Antagonism to Agonism to Elicit Potent Antitumor Activity.  
12 *Cancer Cell* 37(6):850-66.e7. <https://doi.org/10.1016/j.ccell.2020.04.013>
- 13 43. Yu X, James S, Felce JH, Kellermayer B, Johnston DA, Chan HTC, et al (2021) TNF  
14 receptor agonists induce distinct receptor clusters to mediate differential agonistic activity.  
15 *Commun Biol* 4(1):772. <https://doi.org/10.1038/s42003-021-02309-5>
- 16 44. Aloui C, Prigent A, Sut C, Tariket S, Hamzeh-Cognasse H, Pozzetto B, et al (2014) The  
17 signaling role of CD40 ligand in platelet biology and in platelet component transfusion. *Int J*  
18 *Mol Sci* 15(12):22342-64. <https://doi.org/10.3390/ijms151222342>
- 19 45. El Fakhry Y, Alturaihi H, Yacoub D, Liu L, Guo W, Leveillé C, et al (2012) Functional  
20 interaction of CD154 protein with  $\alpha 5\beta 1$  integrin is totally independent from its binding to  
21  $\alpha \text{IIb}\beta 3$  integrin and CD40 molecules. *J Biol Chem* 287(22):18055-66.  
22 <https://doi.org/10.1074/jbc.M111.333989>
- 23 46. McWhirter SM, Pullen SS, Holton JM, Crute JJ, Kehry MR, Alber T (1999)  
24 Crystallographic analysis of CD40 recognition and signaling by human TRAF2. *Proc Natl*  
25 *Acad Sci U S A* 96(15):8408-13. <https://doi.org/10.1073/pnas.96.15.8408>

- 1 47. An HJ, Kim YJ, Song DH, Park BS, Kim HM, Lee JD, et al (2011) Crystallographic and  
2 mutational analysis of the CD40-CD154 complex and its implications for receptor activation.  
3 J Biol Chem 286(13):11226-35. <https://doi.org/10.1074/jbc.M110.208215>
- 4 48. Smulski CR, Beyrath J, Decossas M, Chekkat N, Wolff P, Estieu-Gionnet K, et al (2013)  
5 Cysteine-rich domain 1 of CD40 mediates receptor self-assembly. J Biol Chem  
6 288(15):10914-22. <https://doi.org/10.1074/jbc.M112.427583>
- 7 49. Léveillé C, Bouillon M, Guo W, Bolduc J, Sharif-Askari E, El-Fakhry Y, et al (2007)  
8 CD40 ligand binds to alpha5beta1 integrin and triggers cell signaling. J Biol Chem  
9 282(8):5143-51. <https://doi.org/10.1074/jbc.M608342200>
- 10 50. Tong AW, Stone MJ (2003) Prospects for CD40-directed experimental therapy of human  
11 cancer. Cancer Gene Ther 10(1):1-13. <https://doi.org/10.1038/sj.cgt.7700527>
- 12 51. O'Hara MH, O'Reilly EM, Varadhachary G, Wolff RA, Wainberg ZA, Ko AH, et al  
13 (2021) CD40 agonistic monoclonal antibody APX005M (sotigalimab) and chemotherapy,  
14 with or without nivolumab, for the treatment of metastatic pancreatic adenocarcinoma: an  
15 open-label, multicentre, phase 1b study. Lancet Oncol 22(1):118-31.  
16 [https://doi.org/10.1016/s1470-2045\(20\)30532-5](https://doi.org/10.1016/s1470-2045(20)30532-5)
- 17 52. White AL, Chan HT, French RR, Willoughby J, Mockridge CI, Roghanian A, et al (2015)  
18 Conformation of the human immunoglobulin G2 hinge imparts superagonistic properties to  
19 immunostimulatory anticancer antibodies. Cancer Cell 27(1):138-48.  
20 <https://doi.org/10.1016/j.ccell.2014.11.001>
- 21 53. Orr CM, Fisher H, Yu X, Chan CH, Gao Y, Duriez PJ, et al (2022) Hinge disulfides in  
22 human IgG2 CD40 antibodies modulate receptor signaling by regulation of conformation and  
23 flexibility. Sci Immunol 7(73):eabm3723. <https://doi.org/10.1126/sciimmunol.abm3723>

- 1 54. Bournazos S, DiLillo DJ, Ravetch JV (2015) The role of Fc-Fc $\gamma$ R interactions in IgG-  
2 mediated microbial neutralization. *J Exp Med* 212(9):1361-9.  
3 <https://doi.org/10.1084/jem.20151267>
- 4 55. Ceglia V, Zurawski S, Montes M, Kroll M, Bouteau A, Wang Z, et al (2021) Anti-CD40  
5 Antibody Fused to CD40 Ligand Is a Superagonist Platform for Adjuvant Intrinsic DC-  
6 Targeting Vaccines. *Front Immunol* 12:786144. <https://doi.org/10.3389/fimmu.2021.786144>
- 7 56. Lund J, Pound JD, Jones PT, Duncan AR, Bentley T, Goodall M, et al (1992) Multiple  
8 binding sites on the CH2 domain of IgG for mouse Fc gamma R11. *Mol Immunol* 29(1):53-9.  
9 [https://doi.org/10.1016/0161-5890\(92\)90156-r](https://doi.org/10.1016/0161-5890(92)90156-r)
- 10 57. Tamm A, Schmidt RE (1997) IgG binding sites on human Fc gamma receptors. *Int Rev*  
11 *Immunol* 16(1-2):57-85. <https://doi.org/10.3109/08830189709045703>
- 12 58. Bournazos S, Gupta A, Ravetch JV (2020) The role of IgG Fc receptors in antibody-  
13 dependent enhancement. *Nat Rev Immunol* 20(10):633-43. [https://doi.org/10.1038/s41577-](https://doi.org/10.1038/s41577-020-00410-0)  
14 [020-00410-0](https://doi.org/10.1038/s41577-020-00410-0)
- 15 59. Wines BD, Powell MS, Parren PW, Barnes N, Hogarth PM (2000) The IgG Fc contains  
16 distinct Fc receptor (FcR) binding sites: the leukocyte receptors Fc gamma RI and Fc gamma  
17 RIIa bind to a region in the Fc distinct from that recognized by neonatal FcR and protein A. *J*  
18 *Immunol* 164(10):5313-8. <https://doi.org/10.4049/jimmunol.164.10.5313>
- 19 60. Leabman MK, Meng YG, Kelley RF, DeForge LE, Cowan KJ, Iyer S (2013) Effects of  
20 altered Fc $\gamma$ R binding on antibody pharmacokinetics in cynomolgus monkeys. *MAbs*  
21 5(6):896-903. <https://doi.org/10.4161/mabs.26436>
- 22 61. Afford SC, Randhawa S, Eliopoulos AG, Hubscher SG, Young LS, Adams DH (1999)  
23 CD40 activation induces apoptosis in cultured human hepatocytes via induction of cell  
24 surface fas ligand expression and amplifies fas-mediated hepatocyte death during allograft  
25 rejection. *J Exp Med* 189(2):441-6. <https://doi.org/10.1084/jem.189.2.441>

- 1 62. Meibohm B, Zhou H (2012) Characterizing the impact of renal impairment on the clinical  
2 pharmacology of biologics. *J Clin Pharmacol* 52(1 Suppl):54s-62s.  
3 <https://doi.org/10.1177/0091270011413894>
- 4 63. Inwald DP, McDowall A, Peters MJ, Callard RE, Klein NJ (2003) CD40 is constitutively  
5 expressed on platelets and provides a novel mechanism for platelet activation. *Circ Res*  
6 92(9):1041-8. <https://doi.org/10.1161/01.Res.0000070111.98158.6c>
- 7 64. Liew PX, Kubes P (2019) The Neutrophil's Role During Health and Disease. *Physiol Rev*  
8 99(2):1223-48. <https://doi.org/10.1152/physrev.00012.2018>
- 9 65. Gardner MR, Fetzer I, Kattenhorn LM, Davis-Gardner ME, Zhou AS, Alfant B, et al  
10 (2019) Anti-drug Antibody Responses Impair Prophylaxis Mediated by AAV-Delivered  
11 HIV-1 Broadly Neutralizing Antibodies. *Mol Ther* 27(3):650-60.  
12 <https://doi.org/10.1016/j.ymthe.2019.01.004>
- 13 66. Lee WS, Reynaldi A, Amarasena T, Davenport MP, Parsons MS, Kent SJ (2021) Anti-  
14 Drug Antibodies in Pigtailed Macaques Receiving HIV Broadly Neutralising Antibody  
15 PGT121. *Front Immunol* 12:749891. <https://doi.org/10.3389/fimmu.2021.749891>
- 16 67. Kim YJ, Koh EM, Song CH, Byun MS, Choi YR, Jeon EJ, et al (2021) Preclinical  
17 immunogenicity testing using anti-drug antibody analysis of GX-G3, Fc-fused recombinant  
18 human granulocyte colony-stimulating factor, in rat and monkey models. *Sci Rep*  
19 11(1):12004. <https://doi.org/10.1038/s41598-021-91360-7>  
20

1 **Figure legends:**

2 **Figure 1. MAB273 binds CD40 and activates human B cells and MDCs with a similar**  
3 **potency as CP-870,893 *in vitro*.** n=3, mean  $\pm$  SEM. **(A).** Surface expression levels of CD40  
4 were evaluated by flow cytometry after exposure with anti-CD40 Abs (1.5, 0.5, 0.1  $\mu$ g/mL)  
5 for 2 hours at 4°C. **(B).** Flow cytometry (left) and ELISA (right) results showing the signal of  
6 competitive CD40L-biotin-streptavidin conjugate after culture with anti-CD40 Abs (1, 0.5,  
7 0.25, 0.125, 0.063  $\mu$ g/mL) or CD40L (2  $\mu$ g/mL) for 20 minutes at 4°C (for flow cytometry) or  
8 2 hours at room temperature (for ELISA). **(C-D).** Human PBMCs were stimulated with anti-  
9 CD40 Abs (1.5, 0.5, 0.1  $\mu$ g/mL) or TLR7/8L (5  $\mu$ g/mL) for 24 hours at 37°C. Cell activation  
10 markers CD80, CD70 and LN homing marker CCR7 on B cells **(C)** and MDCs **(D)** were  
11 evaluated by flow cytometry. **(E).** Human PBMCs were stimulated with anti-CD40 Abs (0.5,  
12 0.1, 0.01  $\mu$ g/mL) or CpG (1  $\mu$ g/mL) for 5 days. B cell proliferation was indicated by  
13 percentage of CellTrace Violet negative B cells. Representative flow cytometry plots are  
14 shown. ns = not statistically significant. See also Figure S1.

15

16 **Figure 2. CD40 binding and activation remain the same after removing the Fc region of**  
17 **MAB273.** n=3, mean  $\pm$  SEM. **(A).** Cartoon showing the process of generating Fab and F(ab')<sub>2</sub>  
18 fragments of MAB273. **(B).** ELISA results showing the CD40 binding capacity while using  
19 anti-Fab/F(ab')<sub>2</sub> (left) or anti-Fc (right) secondary Abs. **(C).** Surface expression levels of  
20 CD40 were evaluated by flow cytometry after exposure with complete MAB273 or its  
21 Fab/F(ab')<sub>2</sub> fragments (10, 3.33, 0.67 nM) for 2 hours at 4°C. **(D-E).** Human PBMCs were  
22 stimulated with complete MAB273, its Fab/F(ab')<sub>2</sub> fragments (10, 3.33, 0.67 nM) or TLR7/8L  
23 (5  $\mu$ g/mL, as positive control) for 24 hours at 37°C. Cell activation markers CD80, CD70 and  
24 LN homing marker CCR7 on B cells **(D)** and MDCs **(E)** were evaluated by flow cytometry.  
25 **(F).** Human PBMCs were stimulated with complete MAB273, its Fab/F(ab')<sub>2</sub> fragments (3.33,

1 0.67, 0.067 nM) or CpG (1  $\mu$ g/mL, as positive control) for 5 days. B cell proliferation was  
2 indicated by percentage of CellTrace Violet negative B cells. Representative flow cytometry  
3 plots are shown. \* $p < 0.05$ , ns = not statistically significant. See also Figure S1.

4

5 **Figure 3. MAB273 shows potent CD40 binding and activation capacities in rhesus**

6 **macaque PBMCs *in vitro*.** Rhesus PBMCs were stimulated with anti-CD40 Abs, isotype

7 control Ab (1.5, 0.5  $\mu$ g/mL) for 2 hours at 4°C (for CD40) or additional TLR7/8L (5  $\mu$ g/mL,

8 as positive control) for 24 hours at 37°C (for CD80). Surface expression levels of CD40 and

9 cell activation marker CD80 on B cells (**A**) and MDCs (**B**) were evaluated by flow cytometry.

10 n=6, mean  $\pm$  SEM. (**C**). Rhesus PBMCs were stimulated with MAB273, isotype control Ab

11 (0.1, 0.01  $\mu$ g/mL) or CpG (1  $\mu$ g/mL, as positive control) for 5 days. B cell proliferation was

12 indicated by percentage of CellTrace Violet negative B cells. Representative flow cytometry

13 plots are shown. n=5, mean  $\pm$  SEM. (**D**). Level of cytokines (IL-12 p40, IL-6 and TNF) were

14 measured by ELISA, supernatants used were taken from (**A**) and (**B**). n=3, mean  $\pm$  SEM. \* $p <$

15 0.05. See also Figure S1.

16

17 **Figure 4. *In vivo* innate immune activity in rhesus macaques.** (**A**). Outline for toxicity and

18 safety study in rhesus macaques administered 1 mg/kg i.v., 0.1 mg/kg i.v., or 0.1 mg/kg s.c.

19 (n=2 per group). (**B**). Levels of MAB273 in plasma over time (left), AUC (area under curve,

20 right) is calculated after normalizing (left) to linear axes. n=2 per group. (**C-E**). Surface

21 expression levels of CD40 (**C**), cell activation markers CD80 and lymph node homing marker

22 CCR7 on B cells (**D**) and MDCs (**E**) were evaluated by flow cytometry over time. n=2 per

23 group. (**F**) Systemic levels of pro-inflammatory cytokines (IFN- $\gamma$ , IL-6, IL-12 p40) in plasma

24 over time. n=2 per group. See also Figure S2.

25

1 **Figure 5. *In vivo* biodistribution of MAB273. (A).** Rhesus macaques (n=3) were  
2 administered 0.1mg/kg s.c. of Alexa Fluor 680-MAB273 in the skin above the left quad and  
3 0.9% saline solution s.c. in the skin above the right quad. The cartoon shows the sites of  
4 immunization and sampling performed after 24 hours (n=1) or 48 hours (n=2). **(B).**  
5 Histograms show Alexa Fluor 680-MAB273 signal on different cell populations in different  
6 tissues of one representative animal. Control = peripheral blood B cells from the same animal  
7 before immunization with labeled MAB273. **(C).** MAB273+ CD45+ cells normalized by  
8 counting beads at site of injection or draining lymph nodes. n=3, mean  $\pm$  SEM. **(D).** Pie charts  
9 show proportion of different CD45+ immune cells targeted with MAB273 at the injection site,  
10 the primary and secondary draining LNs. **(E-F).** Expression of CD40 at site of injection and  
11 draining lymph nodes **(E)** as well as PBMCs **(F)**. Compiled data were evaluated by flow  
12 cytometry. Geometric mean fluorescence intensity (MFI) is shown. n=3, mean  $\pm$  SEM. See  
13 also Figure S3.

14  
15 **Figure 6. RNA-seq data analysis in different tissues.** RNA-sequencing was performed on  
16 samples from rhesus macaques administered with AF680-MAB273 (see Figure 5). n=3. **(A).**  
17 Volcano plots of differentially expressed genes in skin, inguinal lymph nodes and blood. Up-  
18 regulated genes are in red and down-regulated genes are in blue. The calculation of  
19 differentially expressed genes was based on a control reference for each tissue: D0 pre-  
20 immunization (blood) or saline site of injection (lymph nodes and skin). Dotted grey lines  
21 indicate fold change  $> 1$  and adjusted p-values  $< 0.05$ . **(B-D).** Gene set enrichment analysis  
22 (GSEA) of blood transcription modules significantly enriched in skin **(B)**, lymph nodes **(C)**  
23 and blood **(D)** compared to their respective control samples, color gradient is based on  
24 normalized gene set enrichment scores. All statistical comparisons were adjusted by the

1 Benjamini-Hochberg procedure, adjusted p-values < 0.05 were considered significant. “D0” is  
2 the day before prime immunization, “D2” is 48h after prime. See also Figure S3.

3

4 **Figure 7. MAB273 can potentiate induction of antigen-specific CD4 T cells and CD8 T**  
5 **cells in PBMCs and BAL. (A).** In the therapeutic vaccination group, rhesus macaques (n=3)  
6 were administered 0.1mg/kg s.c. of Env peptides for the first two immunizations then 1 mg/kg  
7 Env peptides plus 0.1 mg/kg MAB273 s.c. for the last immunization; in the prophylactic  
8 vaccination group, rhesus macaques (n=3) were co-injected with 0.1 mg/kg Env peptides plus  
9 0.1 mg/kg MAB273 s.c. for the first two immunizations then 1 mg/kg Env peptides plus 0.1  
10 mg/kg MAB273 s.c. for the third immunization, followed 1 mg/kg Env peptides, 0.1 mg/kg  
11 MAB273 plus 100 µg Env protein for the last immunization. **(B).** Antigen-specific CD4 T  
12 cells and CD8 T cells in PBMCs and BAL in therapeutic vaccination group. n=3. **(C).**  
13 Antigen-specific CD4 T cells and CD8 T cells in PBMCs and BAL in prophylactic  
14 vaccination group. n=3. See also Figure S4.

15

16 **Supplementary Figure 1. Baseline expression of CD40. Related to Figure 1-3. (A).**  
17 Baseline expression of CD40 on different human immune cells. Mean fluorescence intensity  
18 (MFI) of CD40 is shown (n=7). **(B).** Baseline expression of CD40 on different rhesus  
19 macaque immune cells. MFI of CD40 is shown (n=13). **(C).** Gating strategy for innate  
20 phenotyping.

21

22 **Supplementary Figure 2. Safety monitoring and change of cell frequencies. Related to**  
23 **Figure 4. (A).** Safety monitoring by clinical chemistry tests. **(B).** Safety monitoring by  
24 complete blood counts. **(C).** Cell frequencies normalized by CBC over time. **(D).** Weight and  
25 body temperature change over time.



1

2 **Supplementary Figure 3. Validation of Alexa Fluor 680-conjugated MAB273 and gating**

3 **strategy. Related to Figure 5.** Alexa Fluor 680-conjugated MAB273 labeling test (A),

4 binding test (B) and activation test (C) before tracking immunization. (D). Gating strategy for

5 tracking Alexa Fluor 680-conjugated MAB273.

6

7 **Supplementary Figure 4. MAB273 signal *in vivo* and immune cell infiltration. Related to**

8 **Figure 5 and 6.** (A). MAB273+ CD45+ cells normalized by counting beads in peripheral

9 tissues and blood. n=3, mean  $\pm$  SEM. (B). CD45+ immune cells normalized by weight or

10 counting beads at site of injection and draining lymph nodes. (C). Graphs show cell subsets

11 from (B). n=3, mean  $\pm$  SEM. (D). Pie charts show proportion of different CD45+ immune

12 cells at the injection site, the primary and secondary draining LNs. (E). Flow plots of one

13 representative animal show MAB273+ B cells and MAB273+ MDCs at site of injection and

14 draining lymph nodes as well as PBMCs.

15

16 **Supplementary Figure 5. Antibody responses after MAB273 administration. Related to**

17 **Figure 7.** (A). Levels of MAB273 in plasma over time in immunogenicity study.

18 LLOQ=lower limit of quantification, LLOD=lower limit of detection. n=3. (B). Rhesus anti-

19 human MAB273 IgG titers over time. (C). Volcano plots of differentially expressed genes in

20 blood, “D0” is the day before prime immunization, “D79” is 48h after the second boost. (D).

21 Anti-Env peptides IgG titers over time. (E). Anti-Env protein IgG titers over time. Rhesus

22 Plasma from animals who received six immunizations with Env protein immunization was

23 used as positive control.

1 **Supplementary Table 1. Fluorescent staining antibodies used in flow cytometry.**

| Antibody                  | Fluorochrome  | Clone     | Company      | Antibody                               | Fluorochrome | Clone     | Company      |
|---------------------------|---------------|-----------|--------------|----------------------------------------|--------------|-----------|--------------|
| Innate phenotyping        |               |           |              | Antigen-specific T cells surface       |              |           |              |
| CD40                      | FITC          | 5C3       | Biolegend    | OX40                                   | BV510        | L106      | BD           |
| NK <sub>g</sub> 2a        | PE            | Z199      | Beckman      | CCR7                                   | BV786        | G043H7    | Biolegend    |
| CD80                      | BV421         | L307.4    | BD           | CD103                                  | FITC         | 2G5       | Beckman      |
| CCR7                      | PE-Dazzle 594 | G043H7    | Biolegend    | CD8a                                   | BV711        | RPA-T8    | Biolegend    |
| CD123                     | PerCp-Cy5.5   | 7G3       | BD           | CD4                                    | PE-Cy5.5     | S3.5      | Invitrogen   |
| CD3                       | APC-Cy7       | SP34-2    | BD           | CD45RA                                 | BV650        | 5H9       | BD           |
| CD66                      | APC           | TET2      | Miltenyi     | Antigen-specific T cells intracellular |              |           |              |
| CD70                      | BV786         | Ki-24     | BD           | 4-1BB                                  | APC          | 4B4-1     | BD           |
| HLA-DR                    | BV650         | L243      | Biolegend    | IL-2                                   | PE           | MQ1-17H12 | BD           |
| CD11c                     | PE-Cy7        | 3.9       | Biolegend    | CD69                                   | ECD          | TP1.55.3  | Beckman      |
| CD16                      | AF700         | 3G8       | BD           | CD3                                    | APC-Cy7      | SP34.2    | BD           |
| CD20                      | BV605         | 2H7       | Biolegend    | IFN <sub>g</sub>                       | AF700        | B27       | Biolegend    |
| CD14                      | BV510         | M5E2      | Biolegend    | B cell proliferation                   |              |           |              |
| Labeled antibody tracking |               |           |              | HLA-DR                                 | PE-Cy5.5     | Tu36      | ThermoFisher |
| CD1a                      | PE            | SK9       | BD           | CD3                                    | APC-Cy7      | SP34-2    | BD           |
| CD209                     | PerCP-Cy5.5   | DCN46     | BD           | CD20                                   | BV605        | 2H7       | Biolegend    |
| CD40                      | FITC          | 5C3       | Biolegend    | CD40                                   | FITC         | 5C3       | Biolegend    |
| CD11c                     | PE-Cy7        | 3.9       | Biolegend    | CD40L competition                      |              |           |              |
| CD14                      | BV711         | M5E2      | Biolegend    | Streptavidin                           | PE           |           | Biolegend    |
| CD66                      | APC           | TET2      | Miltenyi     | CD3                                    | APC-Cy7      | SP34-2    | BD           |
| CD45                      | BV605         | D058-1283 | BD           | HLA-DR                                 | PE-Cy5.5     | Tu36      | ThermoFisher |
| CCR7                      | PE-Dazzle 594 | G043H7    | Biolegend    | CD11c                                  | PE-Cy7       | 3.9       | Biolegend    |
| CD3                       | APC-Cy7       | SP34-2    | BD           | CD20                                   | BV605        | 2H7       | Biolegend    |
| CD8                       | APC-Cy7       | RPA-T8    | BD           | CD14                                   | BV510        | M5E2      | Biolegend    |
| CD20                      | APC-Cy7       | L27       | BD           | CD16                                   | BV421        | 3G8       | Biolegend    |
| HLA-DR                    | PE-Cy5.5      | Tu36      | ThermoFisher |                                        |              |           |              |
| CD123                     | BV510         | 6H6       | Biolegend    |                                        |              |           |              |
| CD80                      | BV650         | L307.4    | BD           |                                        |              |           |              |
| CD16                      | BV421         | 3G8       | Biolegend    |                                        |              |           |              |

2

Figure 1

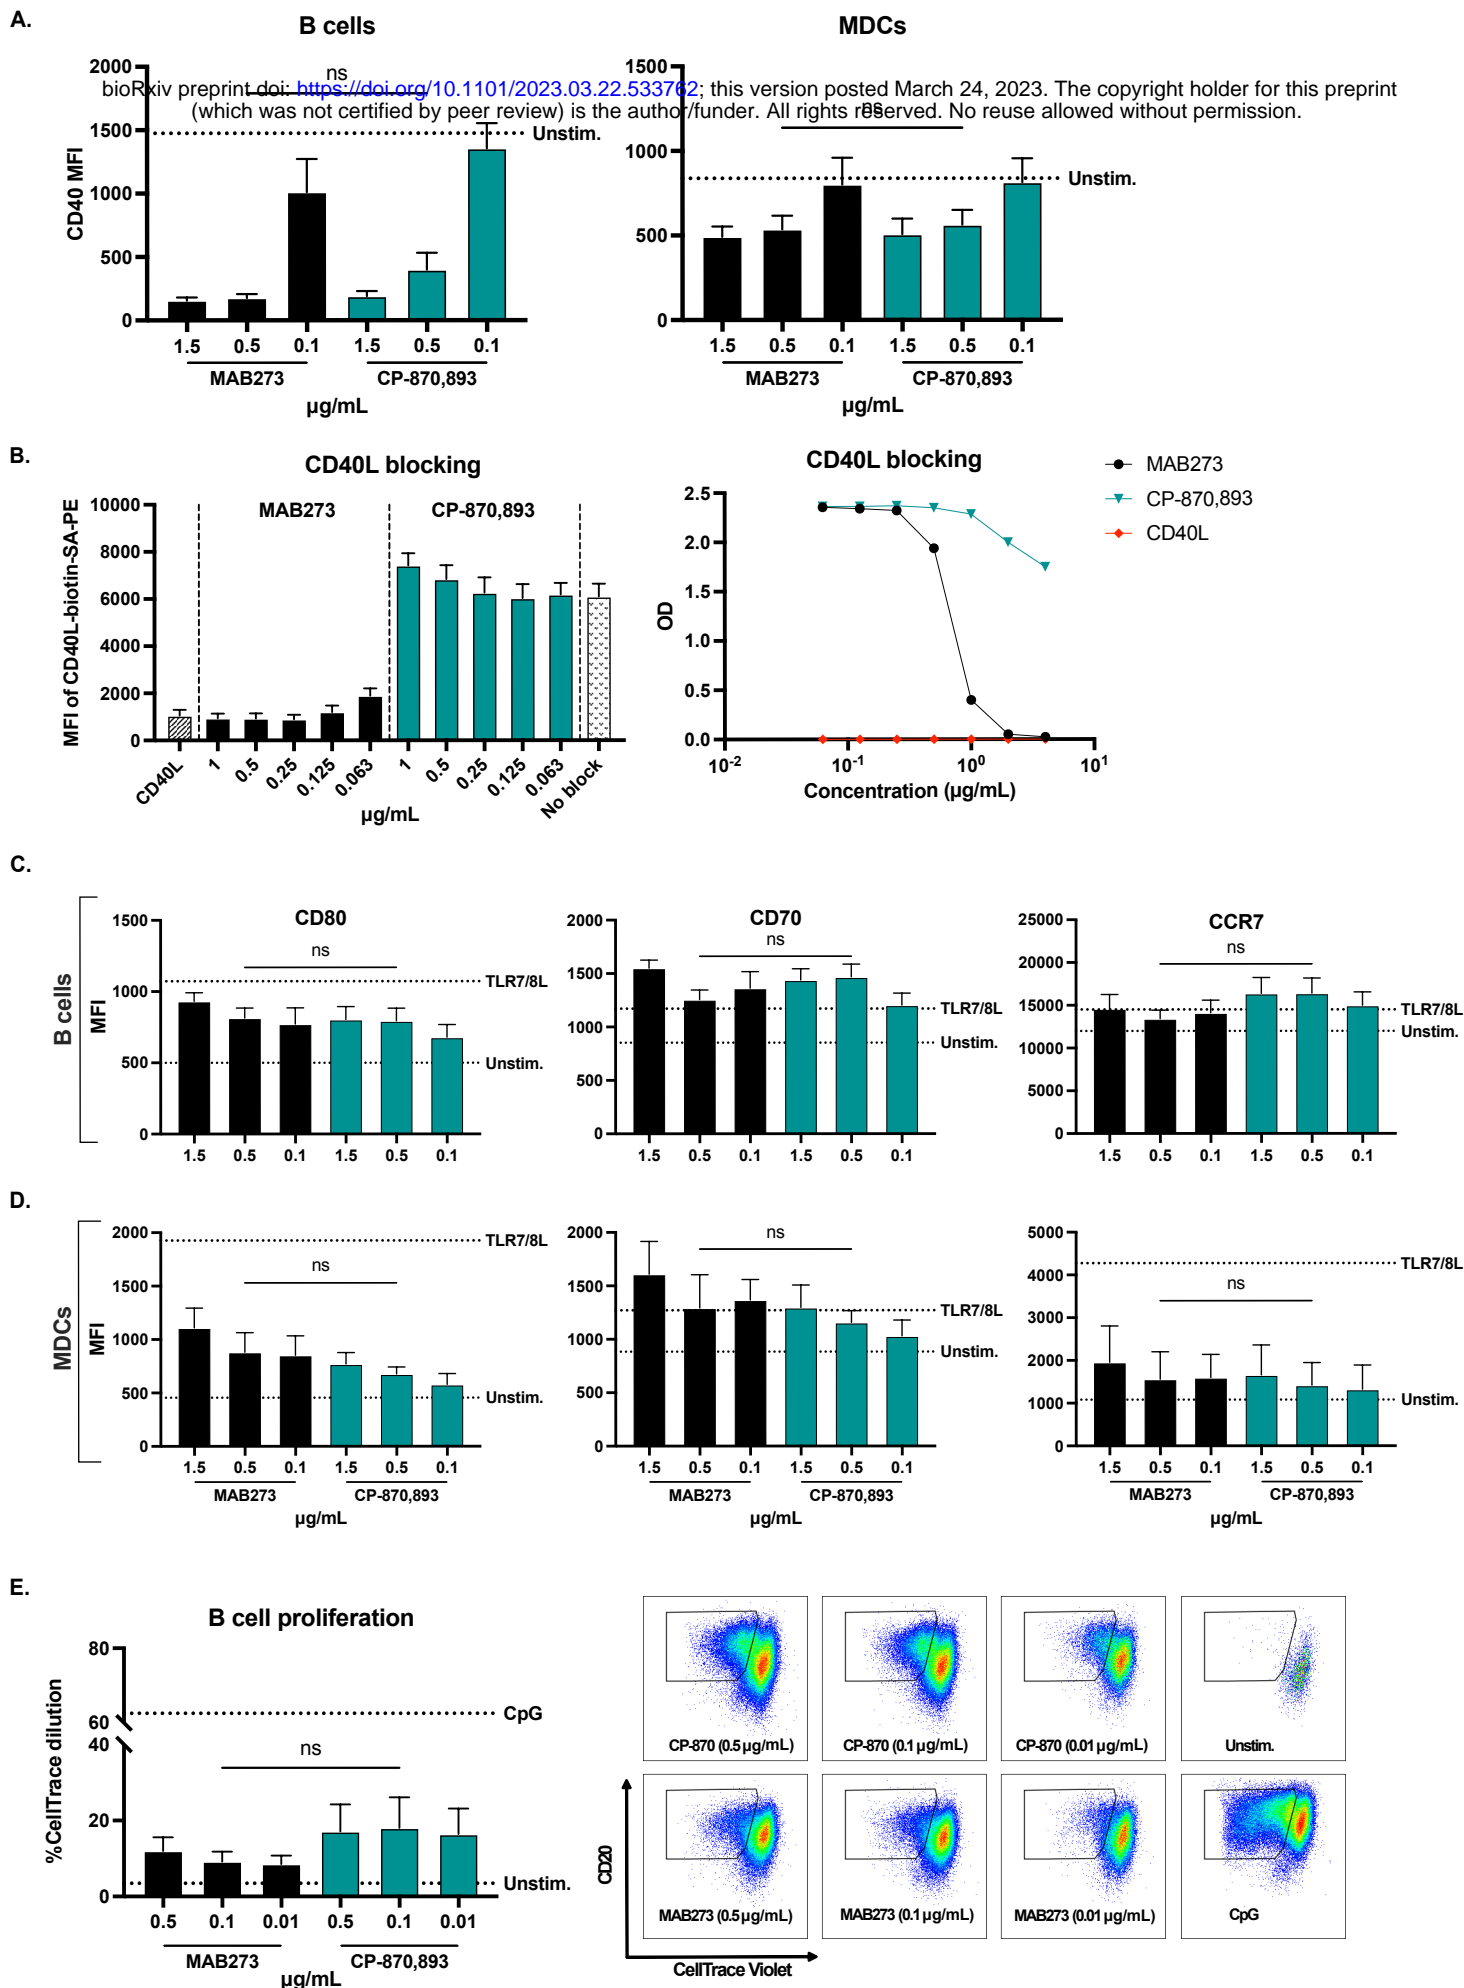

bioRxiv preprint doi: <https://doi.org/10.1101/2023.03.22.533762>; this version posted March 24, 2023. The copyright holder for this preprint (which was not certified by peer review) is the author/funder. All rights reserved. No reuse allowed without permission.

**Figure 2****A.**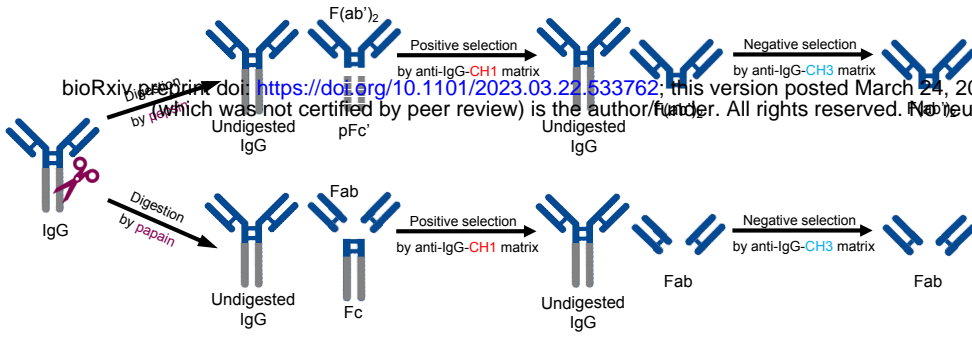**B.**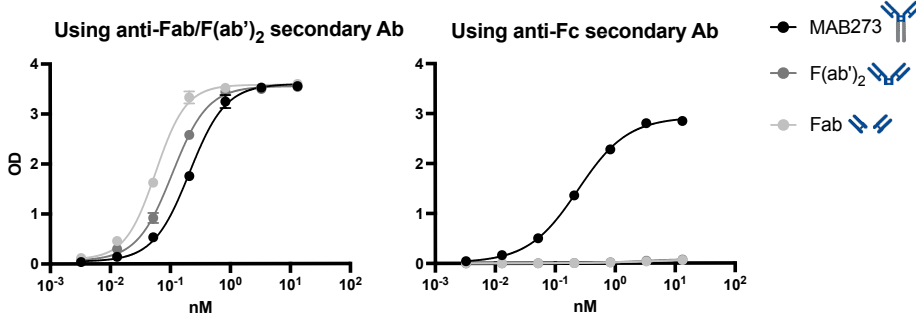**C.**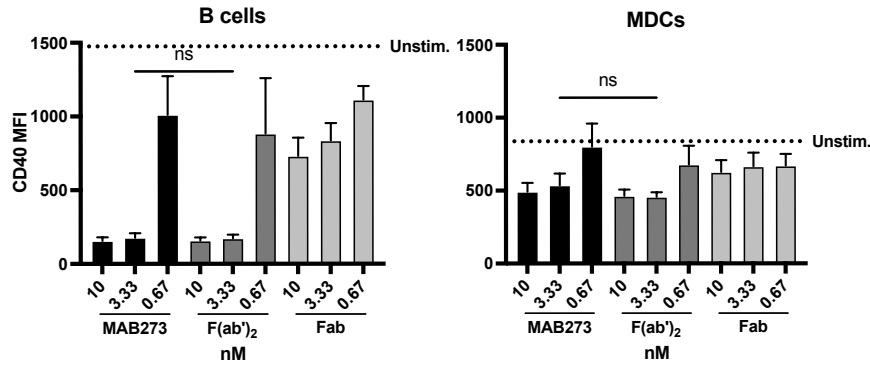**D.**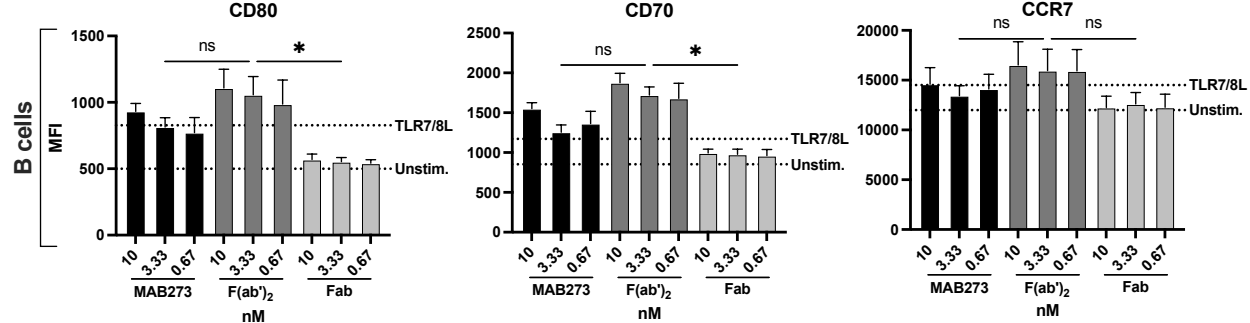**E.**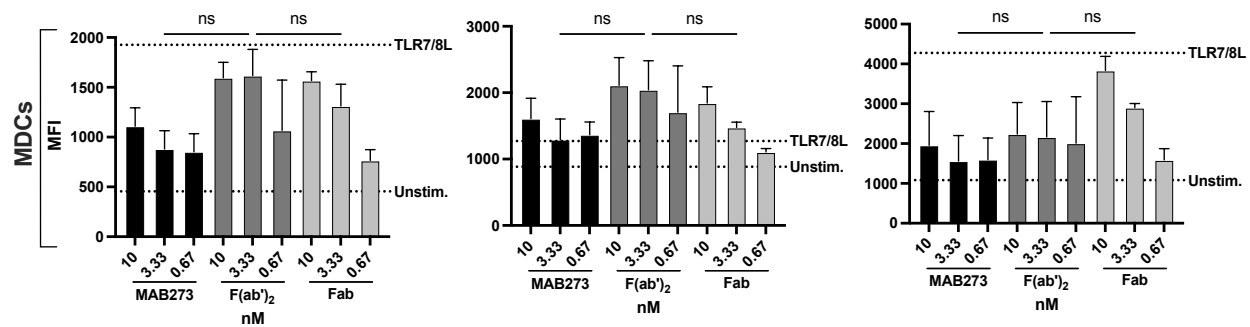**F.**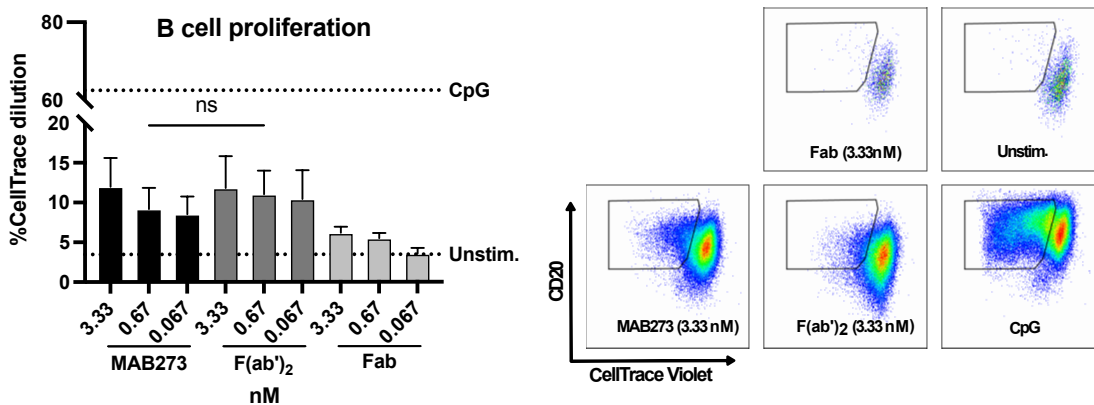

Figure 3

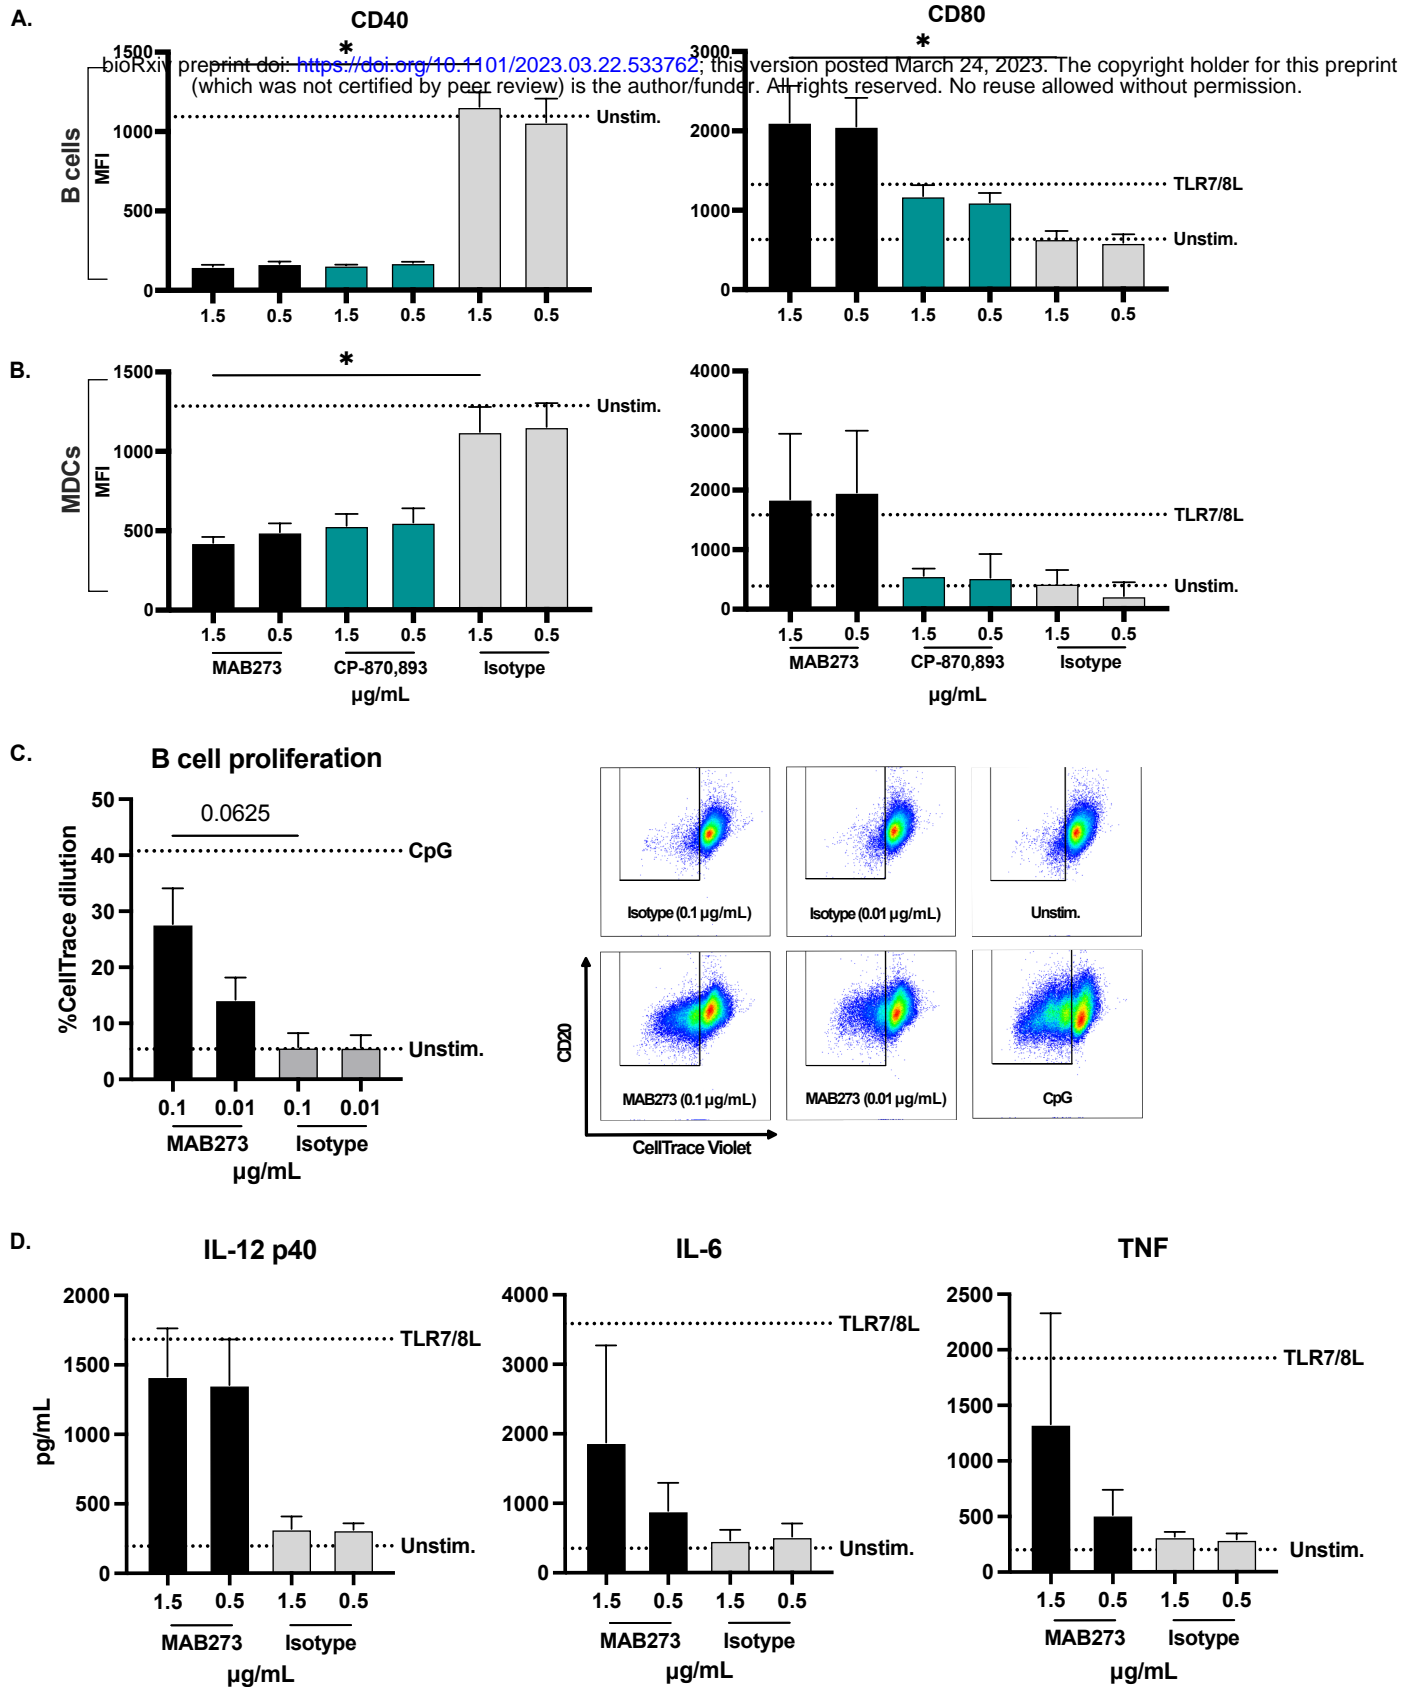

Figure 4

A.

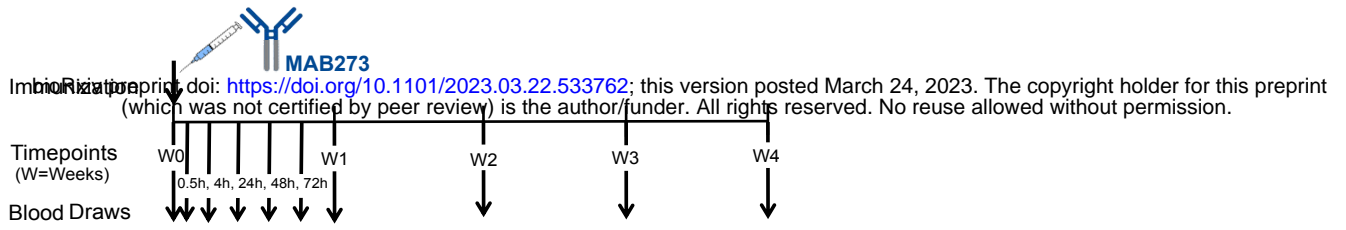

B.

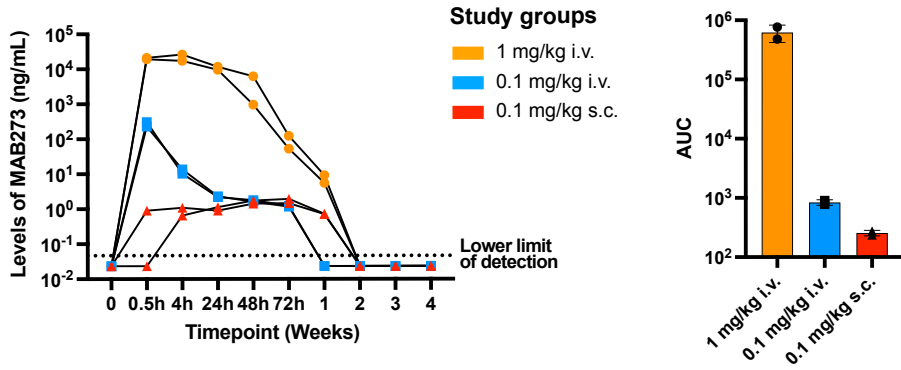

C.

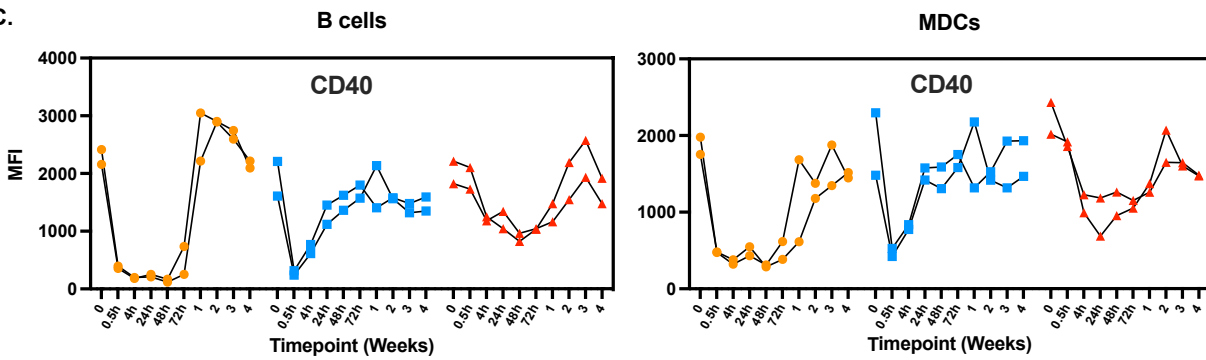

D.

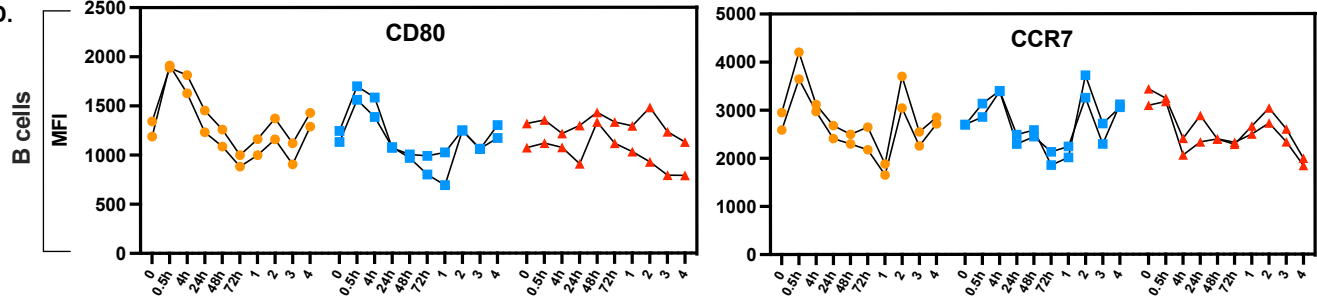

E.

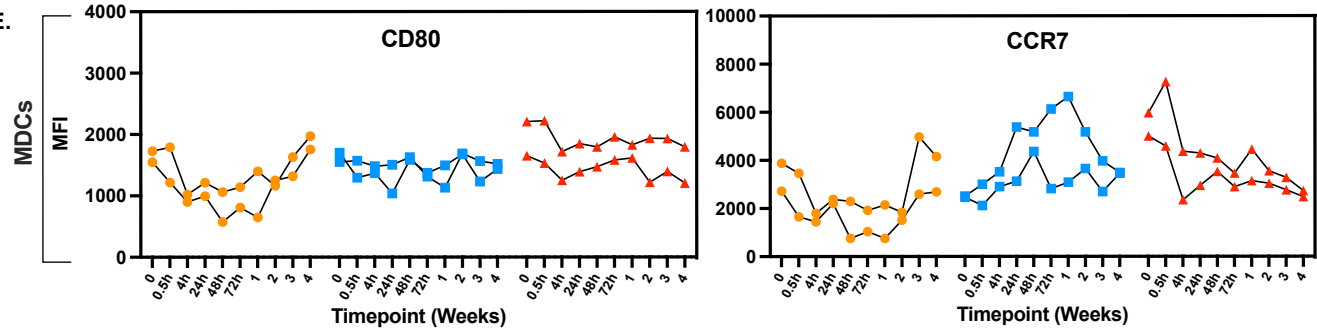

F.

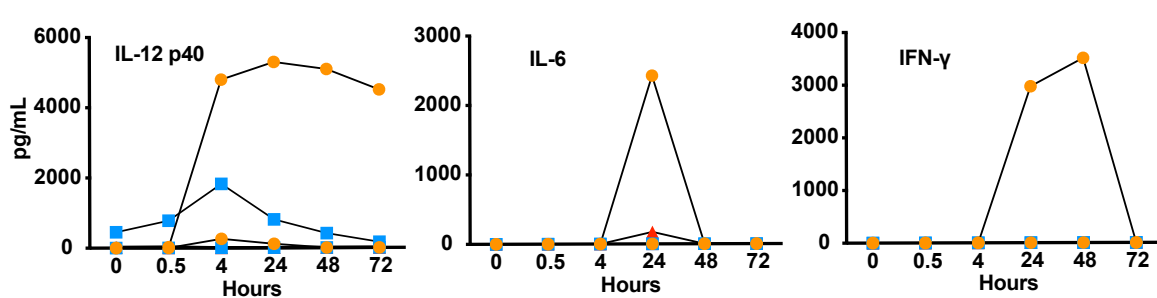

**Figure 5**

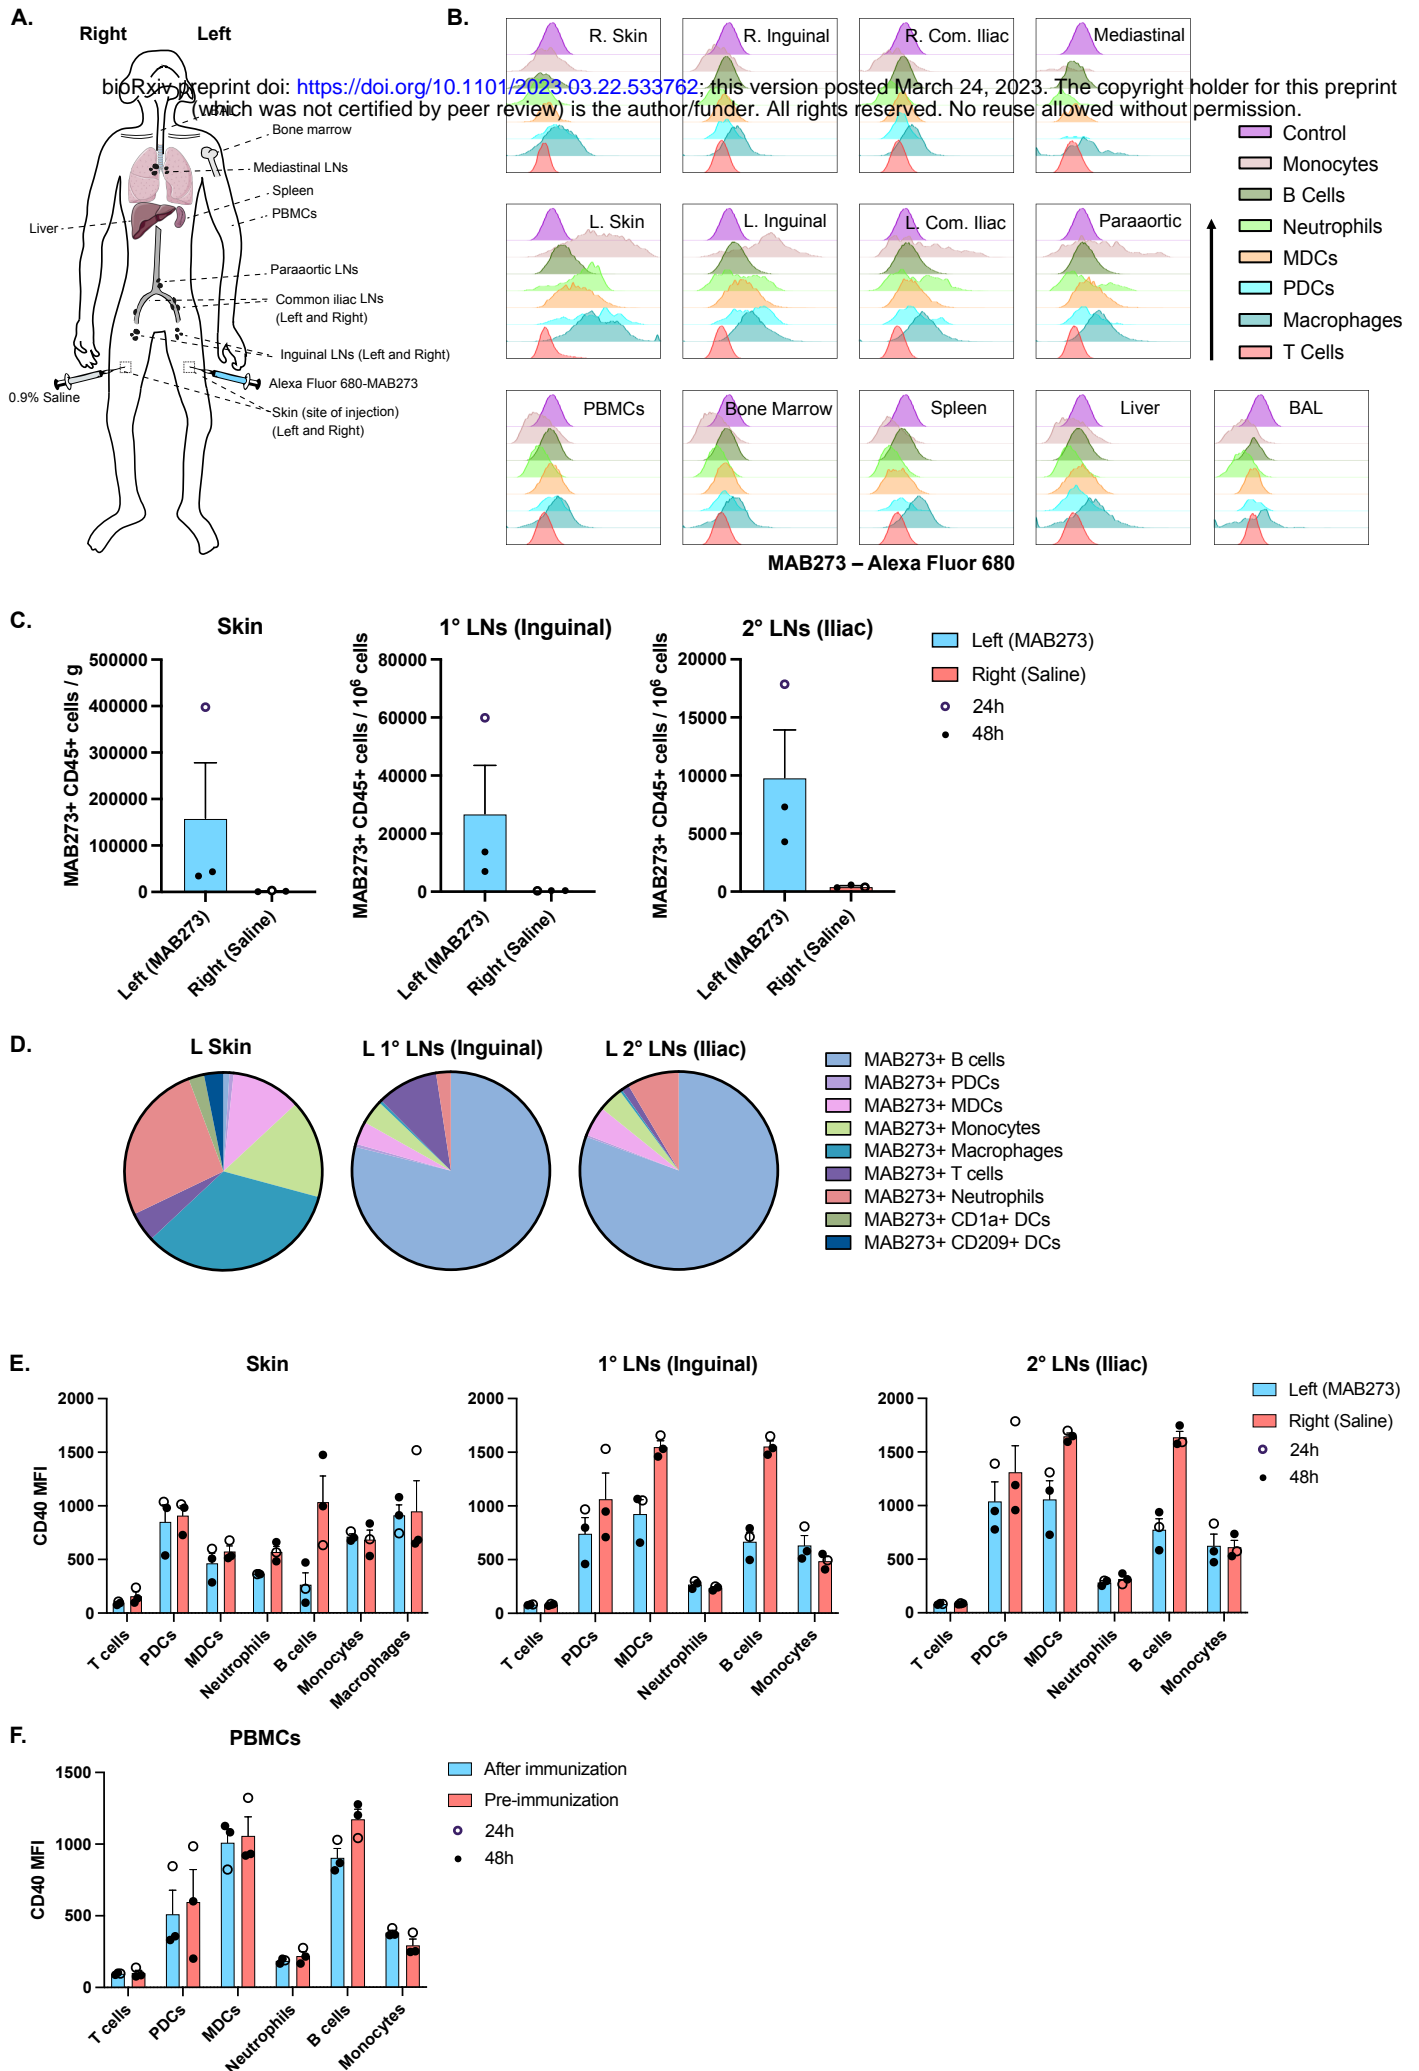

Figure 6

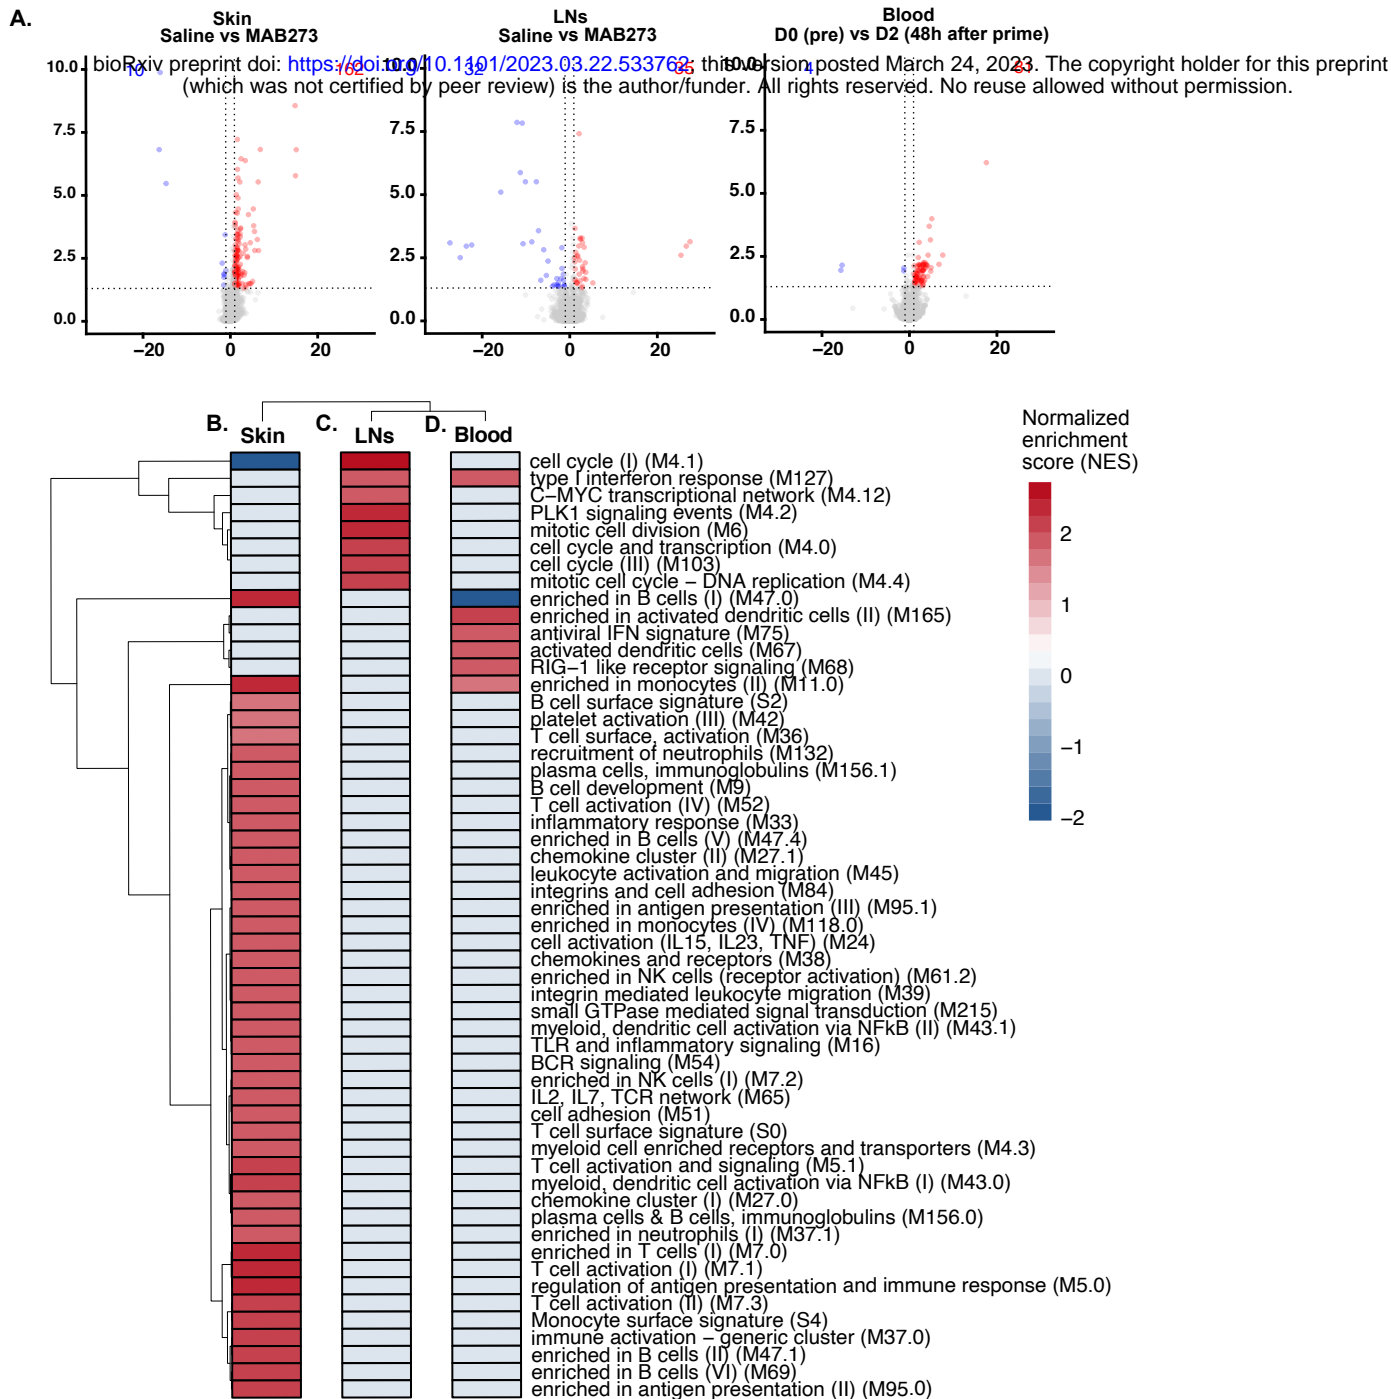



**Figure 7**

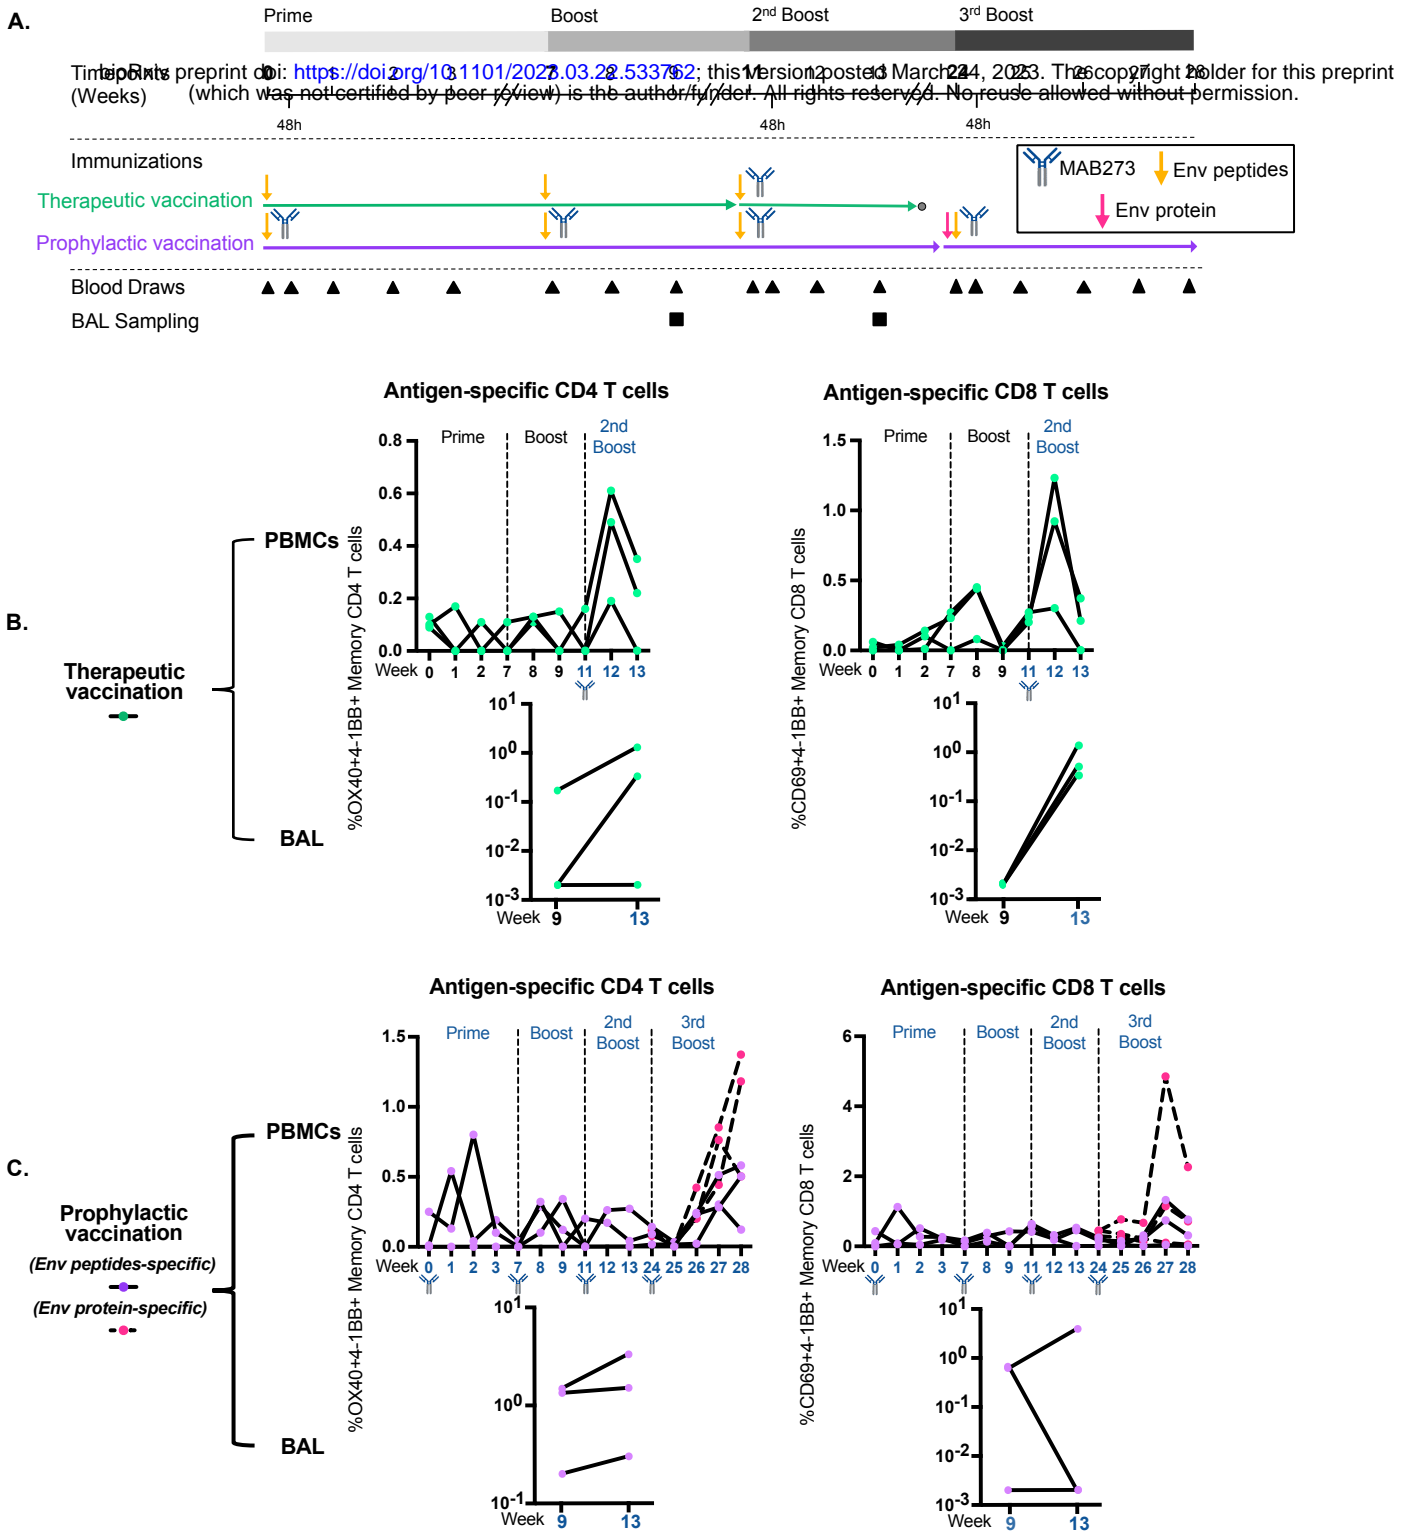

Source: https://www.biorxiv.org/content/10.1101/2023.03.22.533762v1.full.pdf
